# Supplementary material for: iGentifier: indexing and large-scale profiling of unknown transcriptomes
Source: PubMed Central journal article supplement — Nucleic Acids Res. 2007 Jun 25;35(14):4640–8. doi: 10.1093/nar/gkm331 (PMC1950539; doi:10.1093/nar/gkm331), 2007-06-25
Supplement: nar_gkm331_1.pdf [file nar_gkm331_1.pdf]

## Regulation events in Ingrid (*Mlo*)

| Match ID | Signature           | Description                                                                                                                                                           |
|----------|---------------------|-----------------------------------------------------------------------------------------------------------------------------------------------------------------------|
| 1828968  | AGCTAGAAGGGATGCGCC  |                                                                                                                                                                       |
| 1829397  | AGCTTTNGCTGTCCCTGC  | Cysteine synthase (O-acetylserine sulfhydrylase) (O-acetylserine (Thiol)-lyase) (CSase A) (OAS-TL A) pir  JS0762 cysteine synthase                                    |
| 1830188  | AGCTATACGGACATYCCA  | UDP-D-glucuronate decarboxylase [ <i>Hordeum vulgare</i> ] ---- 78 0.0 AAT80327.1                                                                                     |
| 1831156  | AGCTAGACACTATGGATA  | chitinase (EC 3.2.1.14) cht2b precursor - barley emb CAA55345.1  chitinase [ <i>Hordeum vulgare</i> subsp. <i>vulgare</i> ] ---- 67 1e-146 S4884                      |
| 1831606  | AGCTCGAGCAGCAGAGGC  | Putative phosphoribosylanthranilate transferase [ <i>Oryza sativa</i> ( <i>japonica</i> cultivar-group)] ---- 30 0.0 AAM19104.1                                       |
| 1833281  | AGCTGTCNNTTGAGGTCTA | O-methyltransferase [ <i>Secale cereale</i> ] ---- 27 1e-118 AAO23335.1                                                                                               |
| 1834186  | AGCTCTGRACTCACCCGA  |                                                                                                                                                                       |
| 1834509  | AGCTGTACGTCACCCCTA  |                                                                                                                                                                       |
| 1834600  | AGCTCAGGRCGACCCCN   |                                                                                                                                                                       |
| 1834823  | AGCTGAGTTTATGTGTCT  | P0697C12.13 [ <i>Oryza sativa</i> ( <i>japonica</i> cultivar-group)] dbj BAB64678.1  P0697C12.13 [ <i>Oryza sativa</i> ( <i>japonica</i> cultivar-group)] ---- 44 2   |
| 1835026  | AGCTTGCCATCTACAMGA  | putative cytochrome P450 [ <i>Hordeum vulgare</i> subsp. <i>vulgare</i> ] ---- 2 2e-80 CAD42637.1                                                                     |
| 1835369  | AGCTAAGAMAACCGCAA   |                                                                                                                                                                       |
| 1835831  | AGCTCCAAAATAAGGCCS  | cytochrome b5 reductase [ <i>Zea mays</i> ] ---- 58 1e-140 AAD17694.1                                                                                                 |
| 1835893  | AGCTCTGGGATCCGCTCG  | unknown protein [ <i>Oryza sativa</i> ( <i>japonica</i> cultivar-group)] gb AAG46152.1  unknown protein [ <i>Oryza sativa</i> ] gb AAP55199.1  unknown p              |
| 1836249  | AGCTCGACATGGAACAA   | OSJNBa0027O01.2 [ <i>Oryza sativa</i> ( <i>japonica</i> cultivar-group)] emb CAD39708.1  OSJNBa0052P16.24 [ <i>Oryza sativa</i> ( <i>japonica</i> cultivar-)          |
| 1836373  | AGCTGTGGAACGACAACA  | RNA-directed RNA polymerase - common tobacco emb CAA09697.1  RNA-directed RNA polymerase [ <i>Nicotiana tabacum</i> ] ---- 1 2e-8                                     |
| 1836426  | AGTTGTACCTGTTGAAT   | cold acclimation protein WCOR413 - wheat gb AAB18207.1  cold acclimation protein WCOR413 [ <i>Triticum aestivum</i> ] ---- 1 1e-55 T068                               |
| 1837036  | AGCTGCCGTTCTATCTTA  | reversibly glycosylated polypeptide [ <i>Triticum aestivum</i> ] ---- 125 0.0 CAA77237.1                                                                              |
| 1837254  | AGCTGTAGATAGAGGAGT  | OSJNBa0013K16.5 [ <i>Oryza sativa</i> ( <i>japonica</i> cultivar-group)] ---- 1 1e-24 CAE03756.1                                                                      |
| 1837600  | AGCTGGNAATCTTGACT   |                                                                                                                                                                       |
| 1838614  | AGCTGTGATTACTGCCGT  | plastocyanin-like domain-containing protein [ <i>Arabidopsis thaliana</i> ] sp Q9T076 ENL2_ARATH Early nodulin-like protein 2 precursor (P                            |
| 1838951  | AGCTARAGTGATGGTGTC  | P0703B11.26 [ <i>Oryza sativa</i> ( <i>japonica</i> cultivar-group)] dbj BAB85306.1  P0703B11.26 [ <i>Oryza sativa</i> ( <i>japonica</i> cultivar-group)] ---- 4 1e   |
| 1838963  | AGTTGCNTAGAGCATGT   | protein kinase ATN1 (EC 2.7.1.-) - <i>Arabidopsis thaliana</i> emb CAA63387.1  protein kinase [ <i>Arabidopsis thaliana</i> ] ---- 3 7e-62 S61766                     |
| 1839376  | AGCTGTCTGAACATTTCT  |                                                                                                                                                                       |
| 1839579  | AGTCCCGCATCATNTTG   | P0481E12.6 [ <i>Oryza sativa</i> ( <i>japonica</i> cultivar-group)] dbj BAB56021.1  P0481E12.6 [ <i>Oryza sativa</i> ( <i>japonica</i> cultivar-group)] ---- 1 1e-1   |
| 1840413  | AGCTGCNNGTCTGGTCTC  | hypothetical protein (clone ES2A) - barley emb CAA55976.1  ES2A [ <i>Hordeum vulgare</i> ] ---- 103 1e-91 S57789                                                      |
| 1840414  | AGCTGTGCGYCTGGCCTC  |                                                                                                                                                                       |
| 1840566  | AGCTGCATTAGTTGGTCT  | putative ribosomal protein [ <i>Oryza sativa</i> ( <i>japonica</i> cultivar-group)] gb AAS01983.1  putative ribosomal protein [ <i>Oryza sativa</i> ( <i>japonica</i> |
| 1840676  | AGCTGCACAAAAGTAAGC  | unnamed protein product [ <i>Oryza sativa</i> ( <i>japonica</i> cultivar-group)] sp P83649 SRS1_ORYSA Salt-stress root protein RS1 dbj BAA965                         |
| 1840809  | AGCTACACGCGTKGTAGC  |                                                                                                                                                                       |
| 1840813  | AGCTATAAGTAGCCACAC  |                                                                                                                                                                       |

| <b>Fragm.<br/>size (bp)</b> | <b>mlo5<br/>Contr<br/>mean</b> | <b>mlo5<br/>Contr<br/>SD</b> | <b>mlo5<br/>Inf<br/>mean</b> | <b>mlo5<br/>Inf<br/>SD</b> | <b>mlo5<br/>p (t-test)</b> | <b>mlo5<br/>Regul.<br/>factor</b> | <b>Mlo<br/>Contr<br/>mean</b> | <b>Mlo<br/>Contr<br/>SD</b> | <b>Mlo<br/>Inf<br/>mean</b> | <b>Mlo<br/>Inf<br/>SD</b> | <b>Mlo<br/>p (t-test)</b> | <b>Mlo<br/>Regul.<br/>factor</b> |
|-----------------------------|--------------------------------|------------------------------|------------------------------|----------------------------|----------------------------|-----------------------------------|-------------------------------|-----------------------------|-----------------------------|---------------------------|---------------------------|----------------------------------|
| 197                         | 2,5                            | 1,2                          | 26,2                         | 6,4                        | 0,003                      | 10,6                              | 1,5                           | 0,6                         | 18,3                        | 5,4                       | 0,006                     | 12,5                             |
| 223                         | 0,2                            | 0,1                          | 2,7                          | 0,6                        | 0,002                      | 11,0                              | 0,4                           | 0,2                         | 2,1                         | 0,5                       | 0,004                     | 5,3                              |
| 90                          | 10,3                           | 4,2                          | 38,4                         | 5,9                        | 0,003                      | 3,7                               | 6,8                           | 0,8                         | 30,1                        | 4,0                       | 0,001                     | 4,4                              |
| 242                         | 1,6                            | 0,1                          | 26,0                         | 11,4                       | 0,021                      | 16,5                              | 1,7                           | 1,4                         | 14,5                        | 9,7                       | 0,207                     | 8,5                              |
| 375                         | 0,8                            | 0,5                          | 5,3                          | 3,2                        | 0,066                      | 6,3                               | 10,6                          | 6,4                         | 42,3                        | 7,4                       | 0,005                     | 4,0                              |
| 166                         | 17,4                           | 5,6                          | 4,4                          | 1,3                        | 0,017                      | -4,0                              | 12,6                          | 3,9                         | 2,0                         | 0,5                       | 0,009                     | -6,4                             |
| 258                         | 10,7                           | 2,9                          | 15,6                         | 4,1                        | 0,171                      | 1,5                               | 3,4                           | 0,7                         | 25,3                        | 6,3                       | 0,004                     | 7,3                              |
| 183                         | 7,9                            | 2,0                          | 62,2                         | 18,1                       | 0,007                      | 7,8                               | 11,4                          | 2,2                         | 47,6                        | 6,1                       | 0,001                     | 4,2                              |
| 247                         | 2,0                            | 1,1                          | 15,8                         | 6,2                        | 0,019                      | 7,9                               | 1,6                           | 0,5                         | 21,8                        | 10,8                      | 0,032                     | 13,3                             |
| 145                         | 4,4                            | 2,7                          | 44,4                         | 6,9                        | 0,001                      | 10,1                              | 4,2                           | 2,5                         | 37,7                        | 5,2                       | 0,001                     | 9,1                              |
| 235                         | 0,7                            | 0,0                          | 13,8                         | 3,3                        | 0,002                      | 20,4                              | 0,6                           | 0,1                         | 10,3                        | 2,8                       | 0,004                     | 17,8                             |
| 174                         | 0,9                            | 0,4                          | 9,5                          | 3,2                        | 0,010                      | 10,6                              | 0,7                           | 0,2                         | 8,8                         | 2,9                       | 0,008                     | 11,9                             |
| 240                         | 16,4                           | 5,3                          | 48,5                         | 3,1                        | 0,001                      | 2,9                               | 9,7                           | 3,0                         | 49,9                        | 4,2                       | 0,000                     | 5,1                              |
| 288                         | 1,3                            | 0,7                          | 12,0                         | 4,6                        | 0,017                      | 9,2                               | 1,5                           | 0,5                         | 12,7                        | 4,5                       | 0,013                     | 8,5                              |
| 321                         | 0,3                            | 0,1                          | 16,4                         | 9,5                        | 0,041                      | 61,7                              | 0,6                           | 0,3                         | 12,3                        | 6,9                       | 0,042                     | 19,7                             |
| 212                         | 2,1                            | 0,4                          | 42,8                         | 7,5                        | 0,001                      | 20,8                              | 1,5                           | 0,8                         | 34,8                        | 10,1                      | 0,005                     | 22,8                             |
| 161                         | 16,8                           | 4,2                          | 2,3                          | 0,6                        | 0,004                      | -7,2                              | 16,5                          | 4,9                         | 2,6                         | 1,0                       | 0,008                     | -6,3                             |
| 252                         | 8,8                            | 2,3                          | 22,1                         | 4,6                        | 0,011                      | 2,5                               | 7,3                           | 1,2                         | 42,5                        | 7,4                       | 0,001                     | 5,8                              |
| 121                         | 3,8                            | 0,6                          | 0,4                          | 0,0                        | 0,001                      | -10,8                             | 4,6                           | 0,9                         | 0,7                         | 0,1                       | 0,002                     | -6,9                             |
| 179                         | 0,6                            | 0,4                          | 2,1                          | 1,3                        | 0,267                      | 3,6                               | 0,3                           | 0,1                         | 2,2                         | 1,0                       | 0,031                     | 6,5                              |
| 154                         | 0,9                            | 0,3                          | 16,5                         | 4,5                        | 0,004                      | 17,6                              | 0,9                           | 0,3                         | 18,7                        | 4,0                       | 0,002                     | 20,2                             |
| 213                         | 0,9                            | 0,5                          | 27,0                         | 12,8                       | 0,023                      | 30,0                              | 1,2                           | 0,6                         | 21,9                        | 11,5                      | 0,035                     | 18,7                             |
| 225                         | 0,6                            | 0,5                          | 4,6                          | 2,4                        | 0,042                      | 7,3                               | 0,5                           | 0,1                         | 4,4                         | 2,5                       | 0,054                     | 9,3                              |
| 299                         | 0,5                            | 0,2                          | 6,6                          | 3,5                        | 0,038                      | 14,4                              | 0,6                           | 0,1                         | 6,8                         | 3,8                       | 0,046                     | 12,0                             |
| 223                         | 7,6                            | 2,5                          | 1,8                          | 0,3                        | 0,016                      | -4,2                              | 12,2                          | 2,7                         | 2,0                         | 0,3                       | 0,003                     | -6,2                             |
| 166                         | 2,1                            | 1,1                          | 31,8                         | 11,7                       | 0,012                      | 15,4                              | 1,3                           | 0,7                         | 29,2                        | 10,9                      | 0,012                     | 22,7                             |
| 165                         | 1,1                            | 0,2                          | 10,9                         | 1,5                        | 0,000                      | 9,8                               | 0,9                           | 0,1                         | 10,2                        | 1,8                       | 0,001                     | 10,9                             |
| 217                         | 27,0                           | 0,3                          | 2,5                          | 1,2                        | 0,000                      | -10,6                             | 17,8                          | 0,6                         | 3,4                         | 0,7                       | 0,000                     | -5,2                             |
| 309                         | 3,9                            | 0,8                          | 0,4                          | 0,1                        | 0,002                      | -9,7                              | 3,4                           | 0,7                         | 0,5                         | 0,2                       | 0,002                     | -6,3                             |
| 161                         | 0,3                            | 0,2                          | 24,0                         | 5,3                        | 0,001                      | 76,5                              | 0,3                           | 0,0                         | 16,0                        | 4,2                       | 0,003                     | 60,2                             |
| 157                         | 2,4                            | 0,5                          | 22,6                         | 2,3                        | 0,000                      | 9,6                               | 2,9                           | 0,7                         | 15,2                        | 2,6                       | 0,001                     | 5,3                              |

1840859 AGCTAGGCATACGTAGTT beta-ketoacyl-CoA synthase, putative [Arabidopsis thaliana] pir|T00951 probable 3-oxoacyl-[acyl-carrier-protein] synthase (EC 2.3.1.  
1841489 AGCTAGGGACNTCGCGTC B1139B11.9 [Oryza sativa (japonica cultivar-group)] ---- 2 2e-46 BAB90781.1  
1841983 AGCTCAACNCGCCGCTTA 12-oxophytodienoic acid reductase [Oryza sativa] emb|CAD89604.1| oxo-phytodienoic acid reductase [Oryza sativa (japonica cultivar  
1842015 AGCTGGCCAAGAGCAGGG HMGI/Y protein [Zea mays] ---- 3 2e-05 CAB40849.1  
1842075 AGCTGACTAACTGCTAAT deoxynucleoside kinase family [Arabidopsis thaliana] ---- 11 1e-169 NP\_565032.2  
1842173 AGCTCGTACSCNACCGTC ----  
1842273 AGCTCAACTGGCTACATG ----  
1842512 AGCTCGGGAACATCARTT ----  
1842864 AGCTGTATGTAAAGTRNC putative alpha-galactosidase preproprotein [Oryza sativa (japonica cultivar-group)] dbj|BAB12570.1| alpha-galactosidase [Oryza sativ  
1843264 AGCTGTTGATGTNGGCCN glutamate-ammonia ligase (EC 6.3.1.2), cytosolic - barley (fragment) ---- 103 0.0 S30569  
1843320 AGCTGTGAGGAANAAGCA putative tetrafunctional protein for glyoxysomal fatty acid beta-oxidation [Oryza sativa] ---- 38 3e-26 NP\_910159.1  
1843591 AGCTCTGGNAACCGWCA P0677H08.8 [Oryza sativa (japonica cultivar-group)] dbj|BAB89793.1| P0677H08.8 [Oryza sativa (japonica cultivar-group)] ---- 7 5e-7  
1844071 AGCTGACTGTCGATGAAC transcription factor EREBP1 [Oryza sativa] ---- 43 1e-136 AAF23899.1  
1844079 AGCTACTGGTGGATTAGT putative arm repeat-containing protein [Oryza sativa (japonica cultivar-group)] ---- 7 1e-170 BAD09539.1  
1844090 AGCTACGTTTCMGGCCGTA ----  
1845187 AGCTCTTGACTCCAAGA putative B12D protein [Oryza sativa (japonica cultivar-group)] ---- 17 2e-35 BAC84633.1  
1845494 AGCTCCACACNNTTCTCT putative mitochondrial dicarboxylate carrier protein [Arabidopsis thaliana] ---- 4 3e-20 AAM63236.1  
1845545 AGCTACCDGTTTGACAAG ----  
1845546 AGTTACTGTTTGACTAG blue copper binding protein [Hordeum vulgare subsp. vulgare] ---- 5 9e-70 CAE51320.1  
1846122 AGCTACACGAGCCNGAAG ----  
1847101 AGCTCTGTTCCCTTTTA ----  
1847160 AGCTCGGTGGCCGGGAAA putative auxin-regulated dual specificity cytosolic kinase [Oryza sativa (japonica cultivar-group)] ---- 4 3e-58 BAC80085.1  
1847840 AGCTAGACACGACGGACA ----  
1848345 AGCTGAAGACCGACCGAT putative zinc finger transcription factor [Oryza sativa (japonica cultivar-group)] dbj|BAB12694.1| putative zinc finger transcription facto  
1848433 AGCTACTGCCGCCGCTGG cytochrome P450 [Triticum aestivum] ---- 7 1e-129 AAG17469.1  
1848508 AGCTCACCAAGTCCCAGT Adenosylhomocysteinase (S-adenosyl-L-homocysteine hydrolase) (AdoHcyase) pir|T06764 adenosylhomocysteinase (EC 3.3.1.1) -  
1848585 AGCTGGTGTGYGTTGTCC hydroxyproline-rich glycoprotein DZ-HRGP [Volvox carteri f. nagariensis] ---- 11 1e-17 CAB62280.1  
1848639 AGTKCCAACCTTCNATA ----  
1848677 AGCTATAGNGGTCGACAA putative latex protein allergen [Oryza sativa (japonica cultivar-group)] dbj|BAD09204.1| putative latex protein allergen [Oryza sativa (j  
1848748 AGCTGGTCTCTATTTGC ----  
1848966 AGCTAAGGGCACGTAGTC ----  
1848988 AGCTGGCAAARMGAATAG putative rubisco subunit binding-protein alpha subunit precursor (60 kDa chaperonin alpha subunit) [Oryza sativa (japonica cultivar-gr  
1849644 AGCTGCCAGCACGAANGN ----  
1849678 AGCTCAAGCTTACCGAC NADP malic enzyme [Oryza sativa (japonica cultivar-group)] ---- 76 0.0 AAQ99276.1  
1849928 AGCTAGYGTAGAATTCAA P0031D11.20 [Oryza sativa (japonica cultivar-group)] dbj|BAB67886.1| P0031D11.20 [Oryza sativa (japonica cultivar-group)] ---- 2 2e

|     |      |      |      |      |       |       |      |     |      |      |       |       |
|-----|------|------|------|------|-------|-------|------|-----|------|------|-------|-------|
| 121 | 0,8  | 0,6  | 12,1 | 4,3  | 0,011 | 15,2  | 1,4  | 0,4 | 15,5 | 4,2  | 0,005 | 11,0  |
| 219 | 2,3  | 0,3  | 10,3 | 3,8  | 0,022 | 4,5   | 1,1  | 0,4 | 11,8 | 5,7  | 0,031 | 10,6  |
| 217 | 5,6  | 0,3  | 18,1 | 1,9  | 0,000 | 3,2   | 3,4  | 0,3 | 13,2 | 1,8  | 0,001 | 3,9   |
| 192 | 35,3 | 2,1  | 33,4 | 0,5  | 0,205 | -1,1  | 11,6 | 0,3 | 47,5 | 2,5  | 0,000 | 4,1   |
| 141 | 6,7  | 1,3  | 26,8 | 2,8  | 0,000 | 4,0   | 5,9  | 0,8 | 24,7 | 3,3  | 0,001 | 4,2   |
| 131 | 2,3  | 0,9  | 42,2 | 9,3  | 0,002 | 18,1  | 2,7  | 1,0 | 30,2 | 2,8  | 0,000 | 11,4  |
| 221 | 2,5  | 0,3  | 13,3 | 3,5  | 0,006 | 5,3   | 0,8  | 0,3 | 15,7 | 4,2  | 0,004 | 19,2  |
| 108 | 0,4  | 0,2  | 2,4  | 0,8  | 0,012 | 5,8   | 0,4  | 0,1 | 4,5  | 0,7  | 0,000 | 12,3  |
| 140 | 9,9  | 0,4  | 2,3  | 0,5  | 0,000 | -4,2  | 10,8 | 1,3 | 2,0  | 0,3  | 0,000 | -5,5  |
| 162 | 1,2  | 0,9  | 15,1 | 2,9  | 0,001 | 13,0  | 0,8  | 0,6 | 11,1 | 2,2  | 0,001 | 13,8  |
| 115 | 2,4  | 0,3  | 0,4  | 0,1  | 0,000 | -6,1  | 2,8  | 0,7 | 0,6  | 0,1  | 0,005 | -4,6  |
| 228 | 2,7  | 1,2  | 10,7 | 3,6  | 0,021 | 4,0   | 1,4  | 0,7 | 11,6 | 4,2  | 0,015 | 8,1   |
| 153 | 1,0  | 0,4  | 3,2  | 0,4  | 0,003 | 3,2   | 0,8  | 0,1 | 3,7  | 0,5  | 0,001 | 4,7   |
| 146 | 4,0  | 0,6  | 20,9 | 2,8  | 0,001 | 5,2   | 3,2  | 1,1 | 15,3 | 2,8  | 0,002 | 4,8   |
| 138 | 0,4  | 0,3  | 4,3  | 1,9  | 0,022 | 9,9   | 0,5  | 0,1 | 4,4  | 2,4  | 0,050 | 8,7   |
| 241 | 0,8  | 0,2  | 49,5 | 7,3  | 0,000 | 58,4  | 0,3  | 0,1 | 48,7 | 7,3  | 0,000 | 152,7 |
| 183 | 6,5  | 0,2  | 19,5 | 4,4  | 0,007 | 3,0   | 2,4  | 0,4 | 14,4 | 2,2  | 0,001 | 6,0   |
| 219 | 2,1  | 1,0  | 13,0 | 2,7  | 0,003 | 6,1   | 1,5  | 0,4 | 18,0 | 5,9  | 0,009 | 12,0  |
| 220 | 4,1  | 0,4  | 57,2 | 14,2 | 0,003 | 14,0  | 2,3  | 0,4 | 74,2 | 9,3  | 0,000 | 32,3  |
| 155 | 0,6  | 0,3  | 53,3 | 35,4 | 0,062 | 85,4  | 0,4  | 0,1 | 40,1 | 31,8 | 0,097 | 90,9  |
| 109 | 5,9  | 0,5  | 1,0  | 0,2  | 0,000 | -6,2  | 6,4  | 2,6 | 1,0  | 0,1  | 0,023 | -6,3  |
| 221 | 2,2  | 0,6  | 8,3  | 1,8  | 0,005 | 3,7   | 1,0  | 0,5 | 10,0 | 2,5  | 0,004 | 9,9   |
| 165 | 0,3  | 0,0  | 15,9 | 7,3  | 0,021 | 47,4  | 0,3  | 0,1 | 6,1  | 2,8  | 0,024 | 18,9  |
| 264 | 5,0  | 1,7  | 0,6  | 0,1  | 0,011 | -8,1  | 7,0  | 2,1 | 1,1  | 0,3  | 0,009 | -6,3  |
| 347 | 0,8  | 0,3  | 37,9 | 7,4  | 0,001 | 49,3  | 1,1  | 0,4 | 38,7 | 2,2  | 0,000 | 33,8  |
| 445 | 0,7  | 0,3  | 3,6  | 1,3  | 0,020 | 5,0   | 1,2  | 0,2 | 5,6  | 1,3  | 0,005 | 4,8   |
| 190 | 27,7 | 10,0 | 2,0  | 0,5  | 0,011 | -13,9 | 16,4 | 6,8 | 2,9  | 0,7  | 0,026 | -5,7  |
| 147 | 2,8  | 0,5  | 16,4 | 6,9  | 0,028 | 5,9   | 1,4  | 0,2 | 10,2 | 3,2  | 0,009 | 7,2   |
| 117 | 0,4  | 0,2  | 44,3 | 21,7 | 0,024 | 116,2 | 0,8  | 0,2 | 45,9 | 4,8  | 0,000 | 56,7  |
| 219 | 1,1  | 0,2  | 6,8  | 1,3  | 0,002 | 6,1   | 0,8  | 0,2 | 8,8  | 0,9  | 0,000 | 10,4  |
| 204 | 0,8  | 0,2  | 39,2 | 5,5  | 0,000 | 50,8  | 1,1  | 0,2 | 40,7 | 4,2  | 0,000 | 36,3  |
| 184 | 0,4  | 0,2  | 4,8  | 1,7  | 0,011 | 11,4  | 0,6  | 0,0 | 6,4  | 1,8  | 0,005 | 11,5  |
| 262 | 0,9  | 0,2  | 8,1  | 1,8  | 0,003 | 9,4   | 0,9  | 0,1 | 8,4  | 0,9  | 0,000 | 9,2   |
| 290 | 1,8  | 1,1  | 21,6 | 3,5  | 0,001 | 11,8  | 2,4  | 0,6 | 20,2 | 3,9  | 0,001 | 8,5   |
| 214 | 4,9  | 2,9  | 7,4  | 0,9  | 0,223 | 1,5   | 2,7  | 1,6 | 19,0 | 2,0  | 0,000 | 7,1   |

1850117 AGCTGTGCGATAATATGTT OSJNBa0086O06.9 [Oryza sativa (japonica cultivar-group)] ---- 23 1e-13 CAE04861.2  
1850879 AGCTGAGCAGTCSWCCGG putative putative glucosyltransferase [Oryza sativa (japonica cultivar-group)] gb|AAP53972.1| putative putative glucosyltransferase [C  
1850896 AGCTGTTCTGCATCGCGG subtilisin-like protein [Toxoplasma gondii] ---- 4 4e-05 AAK94670.1  
1851511 AGCTGTCTAGTGATNNGG  
1851576 AGCTGTGCTTTCAGCAAG ----  
1851844 AGCTGTTTGACCAACTGA  
1852485 AGCTGCGTAGTCGTCTCC  
1852879 AGCTCAAAGTCGTTTTTG  
1852904 AGCTNNATGGTCGGTCTT  
1852948 AGCTGTAAAATTAATGGA germin-like protein - barley emb|CAA63659.1| oxalate oxidase-like protein or germin-like protein [Hordeum vulgare subsp. vulgare] --  
1853220 AGCTGTATGCGTGMGTGC chlorophyll a/b-binding protein CP29 precursor - barley emb|CAA44777.1| Precursor of CP29, core chlorophyll a/b binding (CAB) pro  
1853453 AGCTAATCAGGAANCTRG putative glycine-rich protein [Oryza sativa (japonica cultivar-group)] dbj|BAD09471.1| putative glycine-rich protein [Oryza sativa (japor  
1853463 AGCTCAGATCGTCCGGCC  
1853936 AGCTCCNNCTGCTGTTC xyloglucan-specific fungal endoglucanase inhibitor protein precursor [Lycopersicon esculentum] ---- 1 4e-19 AAN87262.1  
1854170 AGCTGAGATGCWGTHCAC  
1854211 AGCTCAGCCAGGCACTGT OSJNBa0088H09.6 [Oryza sativa (japonica cultivar-group)] ---- 10 0.0 CAE03448.1  
1854433 AGCTAACNATCANATTGT probable pyruvate dehydrogenase beta chain precursor (PDB1) [MIPS] [Neurospora crassa] ---- 1 5e-96 XP\_330191.1  
1854441 AGCTCATGTATCATCACA ----  
1854447 AGCTACAGAGTCTGGTTG ----  
1854923 AGCTACMTACCAAAKCA  
1854963 AGCTACGCCAGATGAACG  
1855156 AGCTATCCTAAGGCATAA hypothetical protein [Oryza sativa (japonica cultivar-group)] gb|AAK98716.1| Hypothetical protein [Oryza sativa] gb|AAP53119.1| hypc  
1855206 AGCTGACAAGGCTCGCCA putative cyclic nucleotide and calmodulin-regulated ion channel protein [Hordeum vulgare subsp. vulgare] ---- 1 3e-13 AAP38213.1  
1855214 AGCTGGCAATGAGGGGNG  
1855318 AGCTACNTAWTTATTTGA glutathione S-transferase GST 34 [Zea mays] ---- 23 4e-84 AAG34842.1  
1855320 AGCTTANNTATTATTTGA blue copper binding protein [Hordeum vulgare subsp. vulgare] ---- 17 3e-69 CAE51320.1  
1855748 AGCTATGCGAAGGACGAC thaumatin-like protein TLP7 [Hordeum vulgare] ---- 9 9e-74 AAK55325.1  
1856336 AGCTAGAAGATGGATKCC UDP-D-glucuronate decarboxylase [Hordeum vulgare] ---- 25 0.0 AAT80328.1  
1856415 AGCTTSCCCCGACTCCAA  
1856439 AGCTCCTGGCAGTTTTGA  
1856693 AGCTCTNCCCCYGCCCGC RUB1-conjugating enzyme [Triticum aestivum] ---- 15 1e-92 AAP80608.1  
1857164 AGCTGCTCTTGTCTTCAG putative receptor-like protein kinase [Oryza sativa (japonica cultivar-group)] ---- 7 1e-140 AAO41138.1  
1857225 AGCTCACCGGCCGCGSSGA putative RNA-binding protein [Oryza sativa (japonica cultivar-group)] gb|AAG21903.1| putative RNA binding protein [Oryza sativa] ----  
1857257 AGCTGCAAATATCGACAT expressed protein [Arabidopsis thaliana] gb|AAQ89631.1| At3g27100 [Arabidopsis thaliana] ---- 10 2e-35 NP\_189346.2  
1857353 AGCTGCMCGCGCCGCTTA

|     |      |     |      |      |       |      |      |     |      |      |       |      |
|-----|------|-----|------|------|-------|------|------|-----|------|------|-------|------|
| 188 | 4,2  | 0,7 | 21,5 | 1,3  | 0,000 | 5,1  | 2,4  | 0,6 | 13,2 | 1,1  | 0,000 | 5,6  |
| 228 | 1,9  | 0,6 | 25,0 | 3,3  | 0,000 | 13,0 | 1,5  | 0,1 | 19,7 | 1,6  | 0,000 | 12,9 |
| 214 | 2,0  | 0,6 | 12,7 | 1,1  | 0,000 | 6,5  | 1,6  | 0,3 | 10,2 | 1,3  | 0,000 | 6,3  |
| 235 | 2,1  | 0,7 | 20,3 | 4,0  | 0,002 | 9,7  | 2,0  | 0,9 | 18,0 | 2,8  | 0,001 | 8,9  |
| 292 |      | 0,0 | 0,5  | 0,3  | 0,028 |      | 0,3  | 0,1 | 1,3  | 0,7  | 0,199 | 5,0  |
| 132 | 0,8  | 0,1 | 14,8 | 4,0  | 0,004 | 19,0 | 0,9  | 0,3 | 21,5 | 10,5 | 0,027 | 22,8 |
| 223 | 6,3  | 1,4 | 61,8 | 4,5  | 0,000 | 9,8  | 7,3  | 1,4 | 41,7 | 7,2  | 0,001 | 5,7  |
| 200 | 0,3  | 0,1 | 16,5 | 5,5  | 0,007 | 63,9 | 0,8  | 0,2 | 16,7 | 4,3  | 0,003 | 20,7 |
| 179 | 0,5  | 0,3 | 3,1  | 0,4  | 0,001 | 6,0  | 0,5  | 0,0 | 2,7  | 0,4  | 0,001 | 5,9  |
| 141 | 2,0  | 0,3 | 27,5 | 9,0  | 0,008 | 13,5 | 0,8  | 0,3 | 29,2 | 7,5  | 0,003 | 34,5 |
| 238 | 0,3  | 0,2 | 8,2  | 2,1  | 0,003 | 28,5 | 0,7  | 0,6 | 5,9  | 1,9  | 0,011 | 8,6  |
| 130 | 1,0  | 0,0 | 11,9 | 3,9  | 0,008 | 12,1 | 0,6  | 0,1 | 7,5  | 2,8  | 0,013 | 13,4 |
| 137 | 4,7  | 0,4 | 1,9  | 0,4  | 0,001 | -2,4 | 5,2  | 0,1 | 1,3  | 0,2  | 0,000 | -3,9 |
| 273 | 3,6  | 0,2 | 29,2 | 4,9  | 0,001 | 8,1  | 2,8  | 0,9 | 20,9 | 5,7  | 0,006 | 7,6  |
| 224 | 9,6  | 1,2 | 19,5 | 2,3  | 0,003 | 2,0  | 4,8  | 0,7 | 24,4 | 3,9  | 0,001 | 5,1  |
| 261 | 2,9  | 1,1 | 26,6 | 2,1  | 0,000 | 9,2  | 3,5  | 1,6 | 28,5 | 1,9  | 0,000 | 8,1  |
| 181 | 1,4  | 0,2 | 2,1  | 0,5  | 0,075 | 1,5  | 4,4  | 1,6 | 0,8  | 0,2  | 0,019 | -5,6 |
| 173 | 1,0  | 0,2 | 46,9 | 6,4  | 0,000 | 47,2 | 0,7  | 0,3 | 22,6 | 3,4  | 0,000 | 30,9 |
| 167 | 14,5 | 3,9 | 33,5 | 6,5  | 0,013 | 2,3  | 4,8  | 1,1 | 33,7 | 6,7  | 0,002 | 7,1  |
| 191 | 3,2  | 0,3 | 11,7 | 1,5  | 0,001 | 3,7  | 2,5  | 0,4 | 9,9  | 0,8  | 0,000 | 4,0  |
| 225 | 32,7 | 6,2 | 4,2  | 0,6  | 0,001 | -7,8 | 30,2 | 4,4 | 10,1 | 0,7  | 0,001 | -3,0 |
| 162 | 14,1 | 2,9 | 2,6  | 1,4  | 0,004 | -5,5 | 11,9 | 2,4 | 2,1  | 0,2  | 0,002 | -5,7 |
| 121 | 44,0 | 5,2 | 9,6  | 1,1  | 0,000 | -4,6 | 47,1 | 7,3 | 8,1  | 0,7  | 0,001 | -5,8 |
| 115 | 1,1  | 0,6 | 3,0  | 0,6  | 0,009 | 2,8  | 1,3  | 0,1 | 18,6 | 3,8  | 0,001 | 14,6 |
| 242 | 1,7  | 1,4 | 11,5 | 3,3  | 0,010 | 6,7  | 1,7  | 0,8 | 13,3 | 5,2  | 0,018 | 7,9  |
| 243 | 4,0  | 2,0 | 49,0 | 16,6 | 0,010 | 12,1 | 4,9  | 2,5 | 52,1 | 15,3 | 0,006 | 10,6 |
| 300 | 0,4  | 0,3 | 28,2 | 3,4  | 0,000 | 68,2 | 0,3  | 0,0 | 17,8 | 13,0 | 0,080 | 57,7 |
| 95  | 19,8 | 6,8 | 75,2 | 13,4 | 0,003 | 3,8  | 11,2 | 2,9 | 75,8 | 10,1 | 0,000 | 6,8  |
| 205 | 1,2  | 0,7 | 25,0 | 13,5 | 0,035 | 21,0 | 1,2  | 0,3 | 11,1 | 5,3  | 0,031 | 9,4  |
| 221 | 2,4  | 0,5 | 33,6 | 7,4  | 0,002 | 13,7 | 2,4  | 0,7 | 31,7 | 11,9 | 0,013 | 13,1 |
| 127 | 1,5  | 0,6 | 7,4  | 1,1  | 0,001 | 5,0  | 1,4  | 0,4 | 8,0  | 0,7  | 0,000 | 5,7  |
| 276 | 5,3  | 0,8 | 14,2 | 3,0  | 0,008 | 2,7  | 3,9  | 0,6 | 19,5 | 3,9  | 0,002 | 5,0  |
| 335 | 18,7 | 2,9 | 10,8 | 1,6  | 0,014 | -1,7 | 26,7 | 3,7 | 5,4  | 1,1  | 0,001 | -5,0 |
| 368 | 2,6  | 0,4 | 1,9  | 0,6  | 0,199 | -1,3 | 4,9  | 1,1 | 1,1  | 0,3  | 0,004 | -4,6 |
| 214 | 18,7 | 4,7 | 60,2 | 8,0  | 0,001 | 3,2  | 11,6 | 4,9 | 60,6 | 4,6  | 0,000 | 5,2  |

1857646 AGCTCAARGAGTCTCTGG tryptophan synthase-related [Arabidopsis thaliana] dbj|BAB10143.1| tryptophan synthase beta chain [Arabidopsis thaliana] gb|AAL91  
1857736 AGCTGAGGCCACGATGN receptor protein kinase PERK1-like protein [Oryza sativa (japonica cultivar-group)] dbj|BAD01266.1| receptor protein kinase PERK1-  
1858326 AGCTACTAMAAAGTNAAG Hypothetical protein [Oryza sativa (japonica cultivar-group)] ---- 2 2e-29 AAN05510.1  
1858811 AGCTACTATAGGACTTGC putative LHY protein [Oryza sativa (japonica cultivar-group)] ---- 3 1e-67 BAC99516.1  
1858927 AGCTTCGGTTGCNNGGTT ----  
1859007 AGCTCAAGGCACGTGTRT unnamed protein product [Arabidopsis thaliana] ---- 3 2e-19 BAB03098.1  
1859471 AGCTTATGTMTTGGTACA  
1859474 AGCTGCATGTGTATGTGT ENSANGP00000023986 [Anopheles gambiae] gb|EAA12549.2| ENSANGP00000023986 [Anopheles gambiae str. PEST] ---- 1 .026  
1859885 AGCTGCAGATCAAGATGN unknown [environmental sequence] ---- 3 5e-09 EAE77593.1  
1860080 AGCTCTAGCCACNNGGCGC  
1860184 AGCTAGCGATTCAAYCATC putative glycine-rich protein [Oryza sativa (japonica cultivar-group)] dbj|BAD09471.1| putative glycine-rich protein [Oryza sativa (japoc  
1860553 AGCTGGAACCTATCTAGG  
1861132 AGCTGTACCACACCCAAM P0001B06.19 [Oryza sativa (japonica cultivar-group)] dbj|BAB16866.1| P0001B06.19 [Oryza sativa (japonica cultivar-group)] ---- 12 1  
1861217 AGCTGGNGACATTAACCT DnaJ protein homolog - kidney bean (fragment) gb|AAB36543.1| DnaJ-like protein [Phaseolus vulgaris] ---- 4 8e-24 T11855  
1861660 AGCTACACCACAATCANN nuclease I [Hordeum vulgare] ---- 8 1e-171 BAA82696.1  
1861808 AGCTGTACAASGGNGTCT  
1862206 AGCTACGGCCTNCGGGAC ----  
1862248 AGCTGGCGANTCATCWTC putative protein kinase [Arabidopsis thaliana] ---- 5 1e-22 AAO00872.1  
1862340 AGCTCGCATTTTCGTGTGT pathogenesis-related protein 10 [Hordeum vulgare] ---- 1 2e-38 AAP04429.1  
1863346 AGCTCCGTGCGAATCGTG putative lipid transfer protein [Oryza sativa (japonica cultivar-group)] gb|AAN05565.1| putative lipid transfer protein [Oryza sativa (japoc  
1863658 AGCTACTGGTGTGGTCNT  
1863660 AGCTCACCGCCGCTGCC tonoplast intrinsic protein gamma - barley emb|CAA56553.1| gamma-TIP-like protein [Hordeum vulgare subsp. vulgare] ---- 4 2e-75 S  
1864298 AGCTCTTGATCATCACA ----  
1864545 AGCTCGGGCCTCGGTGCC B1131B07.13 [Oryza sativa (japonica cultivar-group)] dbj|BAB93351.1| B1131B07.13 [Oryza sativa (japonica cultivar-group)] ---- 5 3e  
1864682 AGCTGTGGTGNTTCTNGG protease inhibitor/seed storage/lipid transfer protein (LTP) family protein [Arabidopsis thaliana] ---- 12 8e-16 NP\_565067.1  
1864854 AGCTCGGCTGCTTATTGC hypothetical protein [Oryza sativa (japonica cultivar-group)] gb|AAO39879.1| hypothetical protein [Oryza sativa (japonica cultivar-grou  
1865123 AGCTTATAGTATTGGATA putative snRNP splicing factor -related [Oryza sativa (japonica cultivar-group)] dbj|BAD03242.1| putative snRNP splicing factor -relate  
1865277 AGCTCGCGCAAGTCAAAT ----  
1865601 AGCTGCATGTGCCTGTGC OSJNBa0043A12.4 [Oryza sativa (japonica cultivar-group)] ---- 2 1e-33 CAE02799.1  
1865617 AGCTCCATGTCGTCTTAA  
1865670 AGCTAGAAGTAYYCAGT chitinase (EC 3.2.1.14) cht2a precursor - barley emb|CAA55344.1| chitinase [Hordeum vulgare subsp. vulgare] ---- 43 1e-148 S4884  
1865717 AGCTTCAGCATAGTATGC ----  
1865844 AGCTGCCATTTCTCTCT P0496H05.27 [Oryza sativa (japonica cultivar-group)] dbj|BAB55695.1| P0468H06.6 [Oryza sativa (japonica cultivar-group)] ---- 1 2e-  
1866186 AGCTCCNACTCAAGATAT  
1866190 AGCTAGAGTGATGTTGTC

|     |      |     |      |      |       |       |      |      |      |     |       |      |
|-----|------|-----|------|------|-------|-------|------|------|------|-----|-------|------|
| 214 | 3,4  | 0,4 | 10,0 | 0,4  | 0,000 | 3,0   | 1,3  | 0,2  | 7,9  | 0,4 | 0,000 | 6,2  |
| 290 | 19,0 | 2,7 | 23,4 | 16,5 | 0,672 | 1,2   | 11,3 | 2,2  | 50,1 | 9,0 | 0,002 | 4,4  |
| 142 | 0,6  | 0,1 | 8,5  | 1,4  | 0,001 | 14,7  | 0,5  | 0,1  | 7,8  | 2,0 | 0,003 | 14,6 |
| 273 | 28,7 | 3,2 | 4,0  | 2,3  | 0,000 | -7,1  | 39,1 | 10,8 | 5,6  | 2,3 | 0,006 | -6,9 |
| 189 | 16,5 | 6,7 | 36,4 | 3,1  | 0,009 | 2,2   | 2,8  | 1,2  | 41,0 | 2,7 | 0,000 | 14,9 |
| 127 | 8,2  | 1,9 | 1,7  | 0,7  | 0,005 | -4,7  | 9,2  | 1,3  | 1,6  | 0,6 | 0,001 | -5,6 |
| 119 | 2,6  | 0,3 | 8,4  | 1,1  | 0,001 | 3,2   | 2,6  | 1,3  | 22,5 | 3,0 | 0,000 | 8,6  |
| 116 | 36,8 | 8,1 | 9,2  | 2,2  | 0,005 | -4,0  | 37,0 | 9,3  | 7,0  | 1,8 | 0,005 | -5,3 |
| 107 | 16,8 | 1,1 | 1,8  | 0,3  | 0,000 | -9,1  | 13,2 | 1,8  | 2,3  | 0,6 | 0,001 | -5,9 |
| 230 | 1,1  | 1,1 | 10,2 | 3,5  | 0,012 | 9,1   | 0,6  | 0,6  | 9,4  | 3,3 | 0,011 | 14,7 |
| 147 | 1,6  | 0,1 | 11,1 | 1,3  | 0,000 | 7,0   | 1,0  | 0,2  | 4,8  | 1,0 | 0,003 | 4,8  |
| 202 | 0,3  | 0,1 | 4,7  | 0,3  | 0,000 | 14,3  | 0,7  | 0,2  | 3,8  | 0,3 | 0,000 | 5,5  |
| 134 | 9,5  | 0,6 | 0,8  | 0,2  | 0,000 | -11,9 | 20,4 | 1,3  | 4,4  | 0,6 | 0,000 | -4,6 |
| 212 |      | 0,0 | 1,2  | 0,3  | 0,004 |       | 0,4  | 0,2  | 1,4  | 0,8 | 0,235 | 3,8  |
| 338 | 1,3  | 0,3 | 0,6  | 0,2  | 0,029 | -2,1  | 3,0  | 0,8  | 0,5  | 0,2 | 0,007 | -6,3 |
| 138 | 0,4  | 0,1 | 8,0  | 1,0  | 0,000 | 22,2  | 0,3  | 0,1  | 6,9  | 0,2 | 0,000 | 21,2 |
| 166 | 0,5  | 0,3 | 0,4  | 0,2  | 0,744 | -1,3  | 1,2  | 0,7  | 0,3  | 0,1 | 0,219 | -4,6 |
| 145 | 1,7  | 0,5 | 14,8 | 3,1  | 0,002 | 8,5   | 1,5  | 0,2  | 8,5  | 2,1 | 0,004 | 5,6  |
| 110 | 2,0  | 0,3 | 17,6 | 2,1  | 0,000 | 8,7   | 2,2  | 0,0  | 13,8 | 0,7 | 0,000 | 6,3  |
| 126 | 8,0  | 1,3 | 42,0 | 1,9  | 0,000 | 5,3   | 7,5  | 1,1  | 35,5 | 6,7 | 0,002 | 4,7  |
| 159 | 1,9  | 1,6 | 5,3  | 1,1  | 0,040 | 2,8   | 0,9  | 0,3  | 4,0  | 0,8 | 0,003 | 4,7  |
| 160 | 4,5  | 2,5 | 20,7 | 1,2  | 0,001 | 4,6   | 2,9  | 0,3  | 16,5 | 6,0 | 0,017 | 5,6  |
| 111 | 0,7  | 0,1 | 60,6 | 4,2  | 0,000 | 86,9  | 0,7  | 0,1  | 29,1 | 2,0 | 0,000 | 42,7 |
| 286 | 0,7  | 0,3 | 3,6  | 2,2  | 0,084 | 5,4   | 0,3  | 0,0  | 3,8  | 2,0 | 0,043 | 11,0 |
| 233 | 0,9  | 0,3 | 7,0  | 1,3  | 0,001 | 7,4   | 0,6  | 0,2  | 6,7  | 1,0 | 0,000 | 10,4 |
| 308 | 0,8  | 0,5 | 7,0  | 1,8  | 0,004 | 8,7   | 0,7  | 0,2  | 5,4  | 0,6 | 0,000 | 7,5  |
| 169 | 6,9  | 1,0 | 0,8  | 0,6  | 0,001 | -8,7  | 6,4  | 1,9  | 0,9  | 0,4 | 0,007 | -7,2 |
| 310 | 1,1  | 0,8 | 4,9  | 2,4  | 0,060 | 4,6   | 0,5  | 0,2  | 4,4  | 1,6 | 0,013 | 8,8  |
| 222 | 4,3  | 0,3 | 20,0 | 1,9  | 0,000 | 4,6   | 4,2  | 0,5  | 16,2 | 0,5 | 0,000 | 3,9  |
| 236 | 0,9  | 0,2 | 1,9  | 0,2  | 0,001 | 2,3   | 0,8  | 0,2  | 3,4  | 0,2 | 0,000 | 4,2  |
| 284 | 3,2  | 1,9 | 55,0 | 5,2  | 0,000 | 17,0  | 4,2  | 0,5  | 29,9 | 1,5 | 0,000 | 7,1  |
| 331 | 0,9  | 0,1 | 0,7  | 0,1  | 0,125 | -1,2  | 3,3  | 0,3  | 0,7  | 0,1 | 0,000 | -4,9 |
| 111 | 0,8  | 0,1 | 17,4 | 5,4  | 0,006 | 21,1  | 0,8  | 0,2  | 14,3 | 4,1 | 0,005 | 17,4 |
| 149 | 30,1 | 5,6 | 3,8  | 1,6  | 0,001 | -7,9  | 22,2 | 4,1  | 4,7  | 1,9 | 0,002 | -4,8 |
| 146 | 1,7  | 0,1 | 78,1 | 9,2  | 0,000 | 45,5  | 2,6  | 0,5  | 63,0 | 6,7 | 0,000 | 24,1 |



1866202 AGCTGAAAGTGARCCATC  
1866216 AGCTAGATTAGATGTGTG Avr9/Cf-9 rapidly elicited protein 74 [Nicotiana tabacum] ---- 3 3e-21 AAP03884.1  
1866345 AGCTGAGGCCCAANAAGA ubiquitin / ribosomal protein CEP52 - rice dbj|BAA02154.1| ubiquitin/ribosomal polyprotein [Oryza sativa (japonica cultivar-group)] ----  
1866638 AGCTGGCCGGAACAGCHN  
1866703 AGCTGCAGGTGGAGATGG P0466H10.24 [Oryza sativa (japonica cultivar-group)] ---- 8 1e-120 BAC15791.1  
1866715 AGCTGCCTGAAGGCTCCC  
1866892 AGCTAAGTAGACATGTTC  
1867003 AGCTCATGTAGCMAHTGA -partial [Oryza sativa (japonica cultivar-group)] ---- 2 .009 AAL86490.1  
1867637 AGCTTGCCAACCTCCCNN  
1867836 AGCTGATCTAACTTGAAT  
1868378 AGCTGTTTTGCTGTAGTC OSJNBa0089N06.15 [Oryza sativa (japonica cultivar-group)] ---- 7 3e-47 CAE04254.3  
1868642 AGCTGTCATAAWTGGAAAT root hair defective 3 GTP-binding protein [Triticum aestivum] ---- 19 1e-101 AAS67855.2  
1868767 AGCTGCAAAACATGTANC putative phosphoribosyl pyrophosphate synthase [Oryza sativa (japonica cultivar-group)] dbj|BAD08028.1| putative phosphoribosyl py  
1868940 AGCTTTCGCGAGAGAGAG HP8 peptide [Homo sapiens] ---- 32 1e-04 CAA60698.1  
1868973 AGCTGGGCACGGAANACT  
1869018 AGCTTGGCMTAAGATGCW B1078G07.35 [Oryza sativa (japonica cultivar-group)] dbj|BAB90213.1| B1078G07.35 [Oryza sativa (japonica cultivar-group)] dbj|BAC  
1869571 AGCTGCTGATACGGTTGY unnamed protein product [Oryza sativa (japonica cultivar-group)] dbj|BAB03362.1| unnamed protein product [Oryza sativa (japonica c  
1869771 AGCTCAAACATTCCTACCG unnamed protein product [Homo sapiens] ---- 3 6e-06 BAC87611.1  
1869841 AGCTAGCCTTGAATCCAA 33 kDa secretory protein-related [Arabidopsis thaliana] dbj|BAA96974.1| 33 kDa secretory protein-like [Arabidopsis thaliana] ---- 18 2e  
1869862 AGCTACTGCCATTGTTGG ----  
1869953 AGCTGTCMNCTCATTAAG ribosomal protein L28-like [Oryza sativa (japonica cultivar-group)] ref|NP\_916554.1| ribosomal protein L28-like [Oryza sativa (japonica  
1870039 AGCTTACACTGCAGGGAA  
1870090 AGCTGTTGTGNCWTCACA ABC transporter-like protein [Glycine max] ---- 1 3e-61 AAL66714.1  
1870549 AGCTGCAGGGAATGTTGC OSJNBa0005N02.3 [Oryza sativa (japonica cultivar-group)] ---- 4 1e-105 CAE02070.2  
1870840 AGCTGCTSCCGCCGCCGG cytochrome P450 [Triticum aestivum] ---- 56 0.0 AAG17469.1  
1870871 AGCTAGCTGGGTTGAGAC putative NEP1-interacting protein [Oryza sativa (japonica cultivar-group)] dbj|BAD08961.1| putative NEP1-interacting protein [Oryza s  
1871201 AGCTCCTCGTCTTGGCAT  
1872107 AGCTCNYGGGGTGTTTGA  
1872639 AGCTTCCCTGCTCCGTGTG  
1872685 AGCTCACACASTGTTGTC ----  
1872872 AGCTCATAACCCGAATGA  
1873068 AGCTCGGCGCAGGATCTA  
1873499 AGCTAGGCTTTGGGNAAN  
1873550 AGCTGTTTCGGGTGGNAGC nodulin-like protein [Oryza sativa (japonica cultivar-group)] ---- 4 1e-114 BAC22240.1  
1874801 AGCTGTGCYAACAAGAGA

|     |      |     |      |      |       |       |      |     |       |      |       |       |
|-----|------|-----|------|------|-------|-------|------|-----|-------|------|-------|-------|
| 136 | 1,3  | 0,5 | 9,8  | 2,1  | 0,003 | 7,4   | 1,2  | 0,1 | 12,2  | 2,2  | 0,001 | 10,2  |
| 124 | 6,3  | 1,6 | 7,8  | 3,5  | 0,551 | 1,2   | 1,4  | 0,6 | 11,2  | 3,4  | 0,008 | 8,3   |
| 229 | 2,5  | 0,3 | 8,1  | 1,9  | 0,008 | 3,3   | 1,8  | 0,5 | 9,1   | 2,0  | 0,004 | 5,1   |
| 264 | 2,2  | 0,2 | 1,0  | 0,5  | 0,017 | -2,2  | 3,3  | 1,1 | 0,5   | 0,2  | 0,013 | -6,8  |
| 291 | 10,4 | 0,9 | 0,6  | 0,2  | 0,000 | -17,9 | 7,9  | 3,4 | 2,1   | 0,3  | 0,042 | -3,8  |
| 298 | 1,3  | 0,1 | 6,1  | 0,5  | 0,000 | 4,7   | 1,5  | 0,3 | 7,4   | 0,2  | 0,000 | 4,8   |
| 188 | 1,0  | 0,1 | 6,9  | 0,6  | 0,000 | 6,6   | 1,0  | 0,3 | 4,4   | 0,5  | 0,000 | 4,4   |
| 94  | 0,3  | 0,1 | 13,2 | 0,3  | 0,000 | 39,6  | 0,4  | 0,1 | 6,5   | 0,3  | 0,000 | 15,8  |
| 92  | 2,1  | 3,1 | 89,5 | 15,2 | 0,001 | 41,9  | 0,5  | 0,0 | 104,2 | 8,4  | 0,000 | 211,2 |
| 210 | 1,4  | 1,3 | 16,7 | 0,7  | 0,000 | 12,2  | 1,3  | 1,0 | 13,6  | 2,6  | 0,002 | 10,7  |
| 146 | 0,2  | 0,0 | 72,7 | 11,6 | 0,000 | 359,5 | 0,4  | 0,1 | 58,2  | 12,6 | 0,001 | 153,5 |
| 183 | 3,8  | 1,2 | 11,7 | 3,2  | 0,016 | 3,0   | 1,6  | 0,7 | 11,5  | 2,2  | 0,002 | 7,1   |
| 150 | 1,1  | 0,5 | 24,4 | 7,7  | 0,006 | 22,2  | 1,2  | 0,5 | 16,3  | 5,8  | 0,011 | 13,6  |
| 209 | 10,7 | 0,4 | 1,3  | 0,1  | 0,000 | -8,2  | 10,9 | 1,4 | 2,4   | 0,3  | 0,001 | -4,5  |
| 233 | 0,9  | 0,7 | 8,6  | 3,0  | 0,012 | 9,8   | 0,6  | 0,4 | 17,1  | 6,5  | 0,012 | 27,1  |
| 265 | 0,6  | 0,0 | 3,1  | 0,5  | 0,001 | 5,4   | 0,7  | 0,1 | 3,3   | 0,2  | 0,000 | 5,0   |
| 139 | 9,1  | 0,7 | 53,0 | 3,7  | 0,000 | 5,8   | 4,7  | 1,4 | 33,5  | 2,5  | 0,000 | 7,1   |
| 229 | 5,0  | 0,3 | 29,5 | 7,4  | 0,005 | 5,9   | 5,6  | 0,6 | 28,6  | 7,2  | 0,005 | 5,1   |
| 156 | 1,4  | 0,5 | 28,7 | 8,2  | 0,005 | 19,9  | 1,3  | 0,4 | 16,8  | 4,5  | 0,004 | 12,5  |
| 164 | 1,5  | 0,2 | 19,4 | 3,4  | 0,001 | 12,8  | 1,5  | 0,4 | 18,0  | 3,1  | 0,001 | 11,9  |
| 196 | 0,6  | 0,3 | 0,7  | 0,3  | 0,164 | 1,2   | 0,4  | 0,3 | 2,3   | 0,1  | 0,000 | 5,3   |
| 219 | 0,6  | 0,2 | 8,4  | 0,4  | 0,000 | 13,1  | 0,7  | 0,3 | 14,2  | 0,3  | 0,000 | 19,5  |
| 111 | 0,7  | 0,1 | 27,8 | 2,0  | 0,000 | 40,4  | 0,5  | 0,1 | 14,3  | 1,0  | 0,000 | 27,2  |
| 304 | 8,9  | 1,7 | 0,9  | 0,6  | 0,002 | -10,0 | 8,5  | 1,9 | 1,1   | 0,7  | 0,003 | -7,7  |
| 278 | 1,2  | 0,5 | 5,8  | 0,5  | 0,000 | 5,0   | 0,7  | 0,5 | 9,0   | 0,3  | 0,000 | 13,4  |
| 148 | 5,4  | 1,5 | 42,8 | 9,7  | 0,003 | 7,9   | 4,9  | 1,4 | 37,8  | 9,3  | 0,004 | 7,7   |
| 177 | 0,8  | 0,4 | 13,1 | 1,3  | 0,000 | 17,3  | 0,6  | 0,5 | 4,6   | 0,6  | 0,001 | 7,6   |
| 237 |      | 0,0 | 1,0  | 0,5  | 0,030 |       | 6,3  | 3,7 | 1,2   | 0,7  | 0,185 | -5,4  |
| 195 | 3,1  | 0,7 | 4,5  | 0,6  | 0,055 | 1,5   | 1,7  | 0,2 | 6,0   | 0,2  | 0,000 | 3,5   |
| 154 | 2,5  | 0,6 | 0,4  | 0,2  | 0,004 | -5,8  | 2,8  | 0,9 | 0,5   | 0,1  | 0,011 | -5,9  |
| 261 |      | 0,0 | 4,5  | 1,9  | 0,015 |       | 0,6  | 0,2 | 6,1   | 2,8  | 0,028 | 9,8   |
| 142 | 1,1  | 0,5 | 39,0 | 34,7 | 0,132 | 36,2  | 0,8  | 0,1 | 78,8  | 37,7 | 0,023 | 92,8  |
| 88  | 1,5  | 0,1 | 4,7  | 0,3  | 0,000 | 3,1   | 1,8  | 0,2 | 7,1   | 0,4  | 0,000 | 4,0   |
| 332 | 0,6  | 0,1 | 3,6  | 0,8  | 0,003 | 6,0   | 0,6  | 0,3 | 4,2   | 0,9  | 0,003 | 6,6   |
| 212 | 1,3  | 0,5 | 9,5  | 2,6  | 0,006 | 7,4   | 1,5  | 0,5 | 9,8   | 2,8  | 0,007 | 6,6   |

1875567 AGCTGCGCGTGAGCATGG putative auxin-induced protein [Oryza sativa (japonica cultivar-group)] dbj|BAD11564.1| putative auxin-induced protein [Oryza sativa (
1875623 AGCTGGAGTGTCTTCAGT putative chloroplast outer envelope hexokinase 1 [Oryza sativa (japonica cultivar-group)] ---- 10 1e-180 NP\_914545.1
1876066 AGCTATAGCCGGGGAGAT putative serine/threonine kinase [Oryza sativa (japonica cultivar-group)] ---- 21 0.0 BAC10350.1
1876444 AGCTAACCTCTAATGGGC
1876499 AGCTCCCTGGNCCTGGCG
1876778 AGCTCAGATGAACAGTTA
1876785 AGCTGTTGCTCCAACAGT cinnamoyl-CoA reductase [Populus balsamifera subsp. trichocarpa] ---- 6 8e-58 CAC07424.1
1876805 AGCTCTCTAATCACCAA
1876861 AGCTGAAATCTTGAAANN cinnamoyl-CoA reductase [Populus balsamifera subsp. trichocarpa] ---- 6 8e-58 CAC07424.1
1877143 AGCTACGACTGTAAGAGT
1877901 AGCTCMTTGTAATAACNA
1877950 AGCTCAAGCTACTCCCAA
1878061 AGCTTGAAGTGCAAAGAT
1878127 AGCTCCGGGCCCGGGCTG
1878408 AGCTACCCACNNTGTCGT
1878810 AGCTATGGCCACGTAGTT UDP-D-glucuronate decarboxylase [Hordeum vulgare] ---- 78 0.0 AAT80327.1
1878980 AGCTGCNGTCTTKTTGG hypothetical protein [Oryza sativa (japonica cultivar-group)] gb|AAM92295.1| hypothetical protein [Oryza sativa (japonica cultivar-grou
1879012 AGCTTAGTAGYCATGACA HECT-domain-containing protein / ubiquitin-transferase family protein [Arabidopsis thaliana] ---- 12 0.0 NP\_188346.1
1879348 AGCTSCGAGCAGTTTTTRA tryptophan synthase beta-subunit [Sorghum bicolor] ---- 63 0.0 AAL73524.1
1879360 AGCTGKGGTAATCCGATT
1879788 AGCTGGTTGCAAGTAATC senescence-associated protein-related [Arabidopsis thaliana] ---- 21 2e-10 NP\_199517.1
1881071 AGCTGTTTTGCTGTAGCC
1881382 AGCTGCATGACCTTGCGA P0678F11.26 [Oryza sativa (japonica cultivar-group)] ---- 3 5e-69 BAB86119.1
1881644 AGCTCTCATTAGAAAGAA ENDOPLASMIN HOMOLOG PRECURSOR (GRP94 HOMOLOG) pir|S33533 heat shock protein 90 homolog precursor - barley emb
1881673 AGCTTAAGCATAGWGTAT Galactoside 2-alpha-L-fucosyltransferase (Xyloglucan alpha-(1,2)-fucosyltransferase) (PsFT1) ---- 4 6e-44 Q9M5Q1
1881777 AGCTCCGTGGTCTTGCGG
1882725 AGCTSNGAACGGTGTACT OSJNBb0061C13.5 [Oryza sativa (japonica cultivar-group)] emb|CAE05458.3| OSJNBa0073E02.18 [Oryza sativa (japonica cultivar-ç
1883029 AGCTGCACGGGTGGTTCGT
1883426 AGCTTGAANAACAGGAAC
1883971 AGCTAGGAGTGCGCAGCA
1884021 AGCTGATCCCTGAATNTA
1884643 AGCTNGAAGTAAARAGAG acyl-coA synthetase [Cicer arietinum] ---- 1 3e-12 CAA06820.1
1885063 AGCTGTGATGGAACATTS
1885169 AGCTGGACCTGRYCATGC putative iron inhibited ABC transporter 2 [Oryza sativa (japonica cultivar-group)] dbj|BAD09633.1| putative iron inhibited ABC transpo
1885185 AGCTCCGSCCAGGCTTT

|     |      |      |      |      |       |      |      |      |      |      |       |      |
|-----|------|------|------|------|-------|------|------|------|------|------|-------|------|
| 208 | 14,5 | 3,9  | 54,2 | 11,1 | 0,004 | 3,7  | 13,0 | 4,4  | 79,1 | 15,7 | 0,002 | 6,1  |
| 156 | 2,8  | 0,2  | 29,8 | 1,7  | 0,000 | 10,8 | 3,1  | 0,2  | 12,3 | 0,9  | 0,000 | 3,9  |
| 92  | 48,5 | 5,4  | 5,0  | 0,4  | 0,000 | -9,7 | 36,4 | 4,5  | 6,2  | 1,2  | 0,000 | -5,9 |
| 192 | 4,1  | 0,6  | 7,6  | 0,5  | 0,001 | 1,9  | 3,7  | 0,4  | 12,5 | 0,2  | 0,000 | 3,4  |
| 241 | 35,2 | 2,0  | 6,1  | 0,8  | 0,000 | -5,8 | 31,6 | 2,0  | 5,8  | 0,9  | 0,000 | -5,5 |
| 160 | 21,3 | 4,6  | 5,1  | 1,7  | 0,004 | -4,2 | 19,5 | 2,8  | 4,4  | 0,8  | 0,001 | -4,4 |
| 154 | 7,3  | 0,3  | 41,6 | 5,2  | 0,000 | 5,7  | 6,8  | 0,6  | 43,1 | 1,6  | 0,000 | 6,3  |
| 134 | 5,6  | 0,3  | 1,9  | 0,2  | 0,000 | -2,9 | 5,6  | 0,7  | 1,3  | 0,0  | 0,001 | -4,1 |
| 88  | 9,9  | 2,3  | 54,5 | 2,0  | 0,000 | 5,5  | 10,2 | 2,3  | 65,6 | 1,9  | 0,000 | 6,4  |
| 173 | 2,1  | 1,1  | 25,7 | 5,5  | 0,002 | 12,2 | 1,6  | 0,7  | 21,9 | 6,1  | 0,005 | 13,3 |
| 172 | 0,3  | 0,2  | 6,7  | 0,5  | 0,000 | 19,8 | 0,5  | 0,1  | 5,7  | 0,5  | 0,000 | 11,2 |
| 137 | 1,1  | 0,8  | 12,1 | 0,6  | 0,000 | 11,1 | 1,5  | 1,4  | 10,1 | 0,7  | 0,001 | 7,0  |
| 159 | 1,2  | 0,7  | 3,4  | 1,3  | 0,041 | 2,8  | 0,7  | 0,3  | 4,4  | 0,9  | 0,003 | 6,3  |
| 213 | 2,2  | 1,7  | 2,3  | 0,9  | 0,493 | 1,1  | 1,0  | 0,3  | 5,2  | 0,7  | 0,001 | 5,4  |
| 114 | 1,1  | 0,6  | 1,9  | 2,4  | 0,444 | 1,8  | 0,7  | 0,0  | 2,5  | 0,3  | 0,000 | 3,7  |
| 127 | 8,8  | 2,6  | 35,8 | 7,2  | 0,004 | 4,1  | 7,0  | 1,4  | 34,5 | 8,1  | 0,004 | 4,9  |
| 191 | 1,1  | 0,3  | 7,5  | 1,2  | 0,001 | 6,9  | 0,8  | 0,3  | 6,4  | 0,8  | 0,000 | 8,3  |
| 217 |      | 0,0  | 69,2 | 40,0 | 0,116 |      | 69,3 | 40,0 | 10,3 | 6,5  | 0,527 | -6,7 |
| 218 | 1,3  | 0,1  | 35,3 | 3,6  | 0,000 | 27,6 | 1,5  | 0,2  | 23,7 | 1,1  | 0,000 | 16,1 |
| 231 | 1,1  | 0,6  | 14,2 | 6,0  | 0,020 | 13,3 | 0,8  | 0,4  | 14,9 | 5,3  | 0,010 | 17,9 |
| 236 | 29,3 | 22,6 | 4,8  | 0,9  | 0,134 | -6,1 | 45,3 | 2,8  | 6,8  | 1,4  | 0,000 | -6,6 |
| 157 | 1,6  | 0,7  | 47,7 | 11,7 | 0,002 | 29,2 | 2,2  | 0,4  | 34,9 | 10,2 | 0,005 | 16,1 |
| 355 | 5,5  | 1,0  | 45,5 | 7,1  | 0,001 | 8,2  | 4,3  | 0,6  | 42,7 | 9,2  | 0,002 | 10,0 |
| 203 | 5,2  | 2,3  | 41,4 | 7,8  | 0,002 | 8,0  | 5,5  | 2,1  | 42,4 | 11,0 | 0,005 | 7,8  |
| 229 | 1,4  | 0,8  | 4,8  | 0,5  | 0,002 | 3,5  | 1,5  | 0,5  | 7,7  | 0,7  | 0,000 | 5,2  |
| 314 | 0,6  | 0,2  | 20,8 | 9,8  | 0,023 | 32,8 | 0,6  | 0,2  | 21,3 | 11,9 | 0,040 | 35,9 |
| 342 | 0,9  | 0,4  | 6,1  | 3,4  | 0,056 | 6,6  | 1,3  | 0,7  | 11,0 | 4,6  | 0,023 | 8,4  |
| 291 | 0,6  | 0,4  | 17,6 | 10,6 | 0,050 | 31,2 | 1,1  | 0,6  | 17,7 | 10,2 | 0,048 | 16,1 |
| 276 | 8,0  | 2,8  | 34,0 | 3,5  | 0,001 | 4,2  | 6,0  | 0,5  | 45,2 | 5,2  | 0,000 | 7,5  |
| 149 | 1,5  | 0,9  | 53,0 | 14,1 | 0,003 | 34,4 | 0,4  | 0,1  | 38,4 | 6,6  | 0,001 | 86,5 |
| 109 | 6,6  | 0,3  | 1,4  | 0,1  | 0,000 | -4,7 | 6,6  | 0,7  | 1,5  | 0,2  | 0,000 | -4,5 |
| 254 | 3,7  | 2,9  | 17,5 | 5,1  | 0,015 | 4,7  | 2,6  | 1,9  | 34,4 | 12,2 | 0,011 | 13,4 |
| 147 | 10,4 | 2,6  | 15,4 | 3,1  | 0,104 | 1,5  | 3,4  | 1,0  | 23,5 | 4,6  | 0,002 | 6,8  |
| 132 |      | 0,0  | 6,1  | 2,3  | 0,010 |      | 0,5  | 0,1  | 3,1  | 1,1  | 0,014 | 6,7  |
| 147 | 1,7  | 0,1  | 17,7 | 0,9  | 0,000 | 10,7 | 1,2  | 0,2  | 16,6 | 2,6  | 0,001 | 13,5 |

1885186 AGCTACCGCCACGGCTTT WIR1A PROTEIN pir|T06988 pathogen-induced protein WIR1A - wheat gb|AAA34311.1| WIR1A ---- 28 7e-07 Q01482  
1885439 AGCTCANAGCGTCAATCG hydroxymethyltransferase [Arabidopsis thaliana] ---- 2 5e-14 AAM64493.1  
1885739 AGCTAGAGATGGAAAAAT  
1886913 AGCTCCGGGATCNTGAGT unknown protein [Oryza sativa (japonica cultivar-group)] ---- 32 2e-74 BAC55839.1  
1888353 AGCTGCTCAGCCATNGCG ----  
1889104 AGCTAATCACGAAACTAA  
1889166 AGCTGCCTGTCCGCGAGT  
1889276 AGCTCATHAGAAAANGTA OSJNBa0084K20.12 [Oryza sativa (japonica cultivar-group)] emb|CAE02488.2| OSJNBa0076N16.10 [Oryza sativa (japonica cultivar-  
1890256 AGCTGGCAATCCNTTGAA Hypothetical protein [Oryza sativa (japonica cultivar-group)] gb|AAN64138.1| Hypothetical protein [Oryza sativa (japonica cultivar-gro  
1890465 AGCTGGCTCGGAGCNTAT ----  
1891887 AGCTACCATAKANGGAAA  
1891986 AGCTNGATCGGTCCATCA  
1892797 AGCTGAGTTCGTRCGAGA  
1893213 AGCTAGCTCANTTCGTCC  
1893729 AGCTGCATGTGTATGTGT ENSANGP00000023986 [Anopheles gambiae] gb|EAA12549.2| ENSANGP00000023986 [Anopheles gambiae str. PEST] ---- 1 .026 .  
1893746 AGCTGGAMMTTCGTGCTG  
1893757 AGCTGCAGAGGTGAYAAG Acetylnithine aminotransferase, mitochondrial precursor (ACOAT) (Acetylnithine transaminase) (AOTA) emb|CAA69936.1| acetyl  
1894069 AGCTGTTNCGAATCGCGG  
1894477 AGCTANTCCCGGACAAAA  
1895122 AGTCRCTGCRCCACTCC  
1896353 AGCTCGGSATTTAGTAGG  
1896934 AGCTACAATGGGAAAYTT  
1897047 AGCTCTCGGRCTCCAAGA putative B12D protein [Oryza sativa (japonica cultivar-group)] ---- 17 2e-35 BAC84633.1  
1898143 AGCTTGACATGGTCAGAT subtilisin-like serine proteinase (EC 3.4.21.-) - rice gb|AAG09442.1| subtilase; SP1 [Oryza sativa] ---- 5 8e-46 JC7518  
1901042 AGCTGCGGGCNGCTACTG unknown protein [Oryza sativa (japonica cultivar-group)] ---- 7 3e-53 BAC98639.1  
1901043 AGCTGYCGGGCGDCCT OSJNBa0070C17.16 [Oryza sativa (japonica cultivar-group)] ---- 3 1e-145 CAE05209.2  
1901932 AGCTTTMGASCCCGAGA  
1904752 AGCTCTCATGGCKAAAGA  
1905291 AGCTCAAGTGGCAAGCGA putative inorganic polyphosphate/ATP-NAD kinase (Poly(P)/ATP NAD kinase [Oryza sativa (japonica cultivar-group)] dbj|BAB92868.1

|     |      |     |      |      |       |      |      |     |      |      |       |      |
|-----|------|-----|------|------|-------|------|------|-----|------|------|-------|------|
| 148 | 2,5  | 2,3 | 65,3 | 12,8 | 0,001 | 25,7 | 2,6  | 2,5 | 66,2 | 18,9 | 0,004 | 25,2 |
| 387 | 1,3  | 0,5 | 32,1 | 10,9 | 0,008 | 23,9 | 1,7  | 0,8 | 39,3 | 13,6 | 0,009 | 23,2 |
| 206 | 0,8  | 0,4 | 40,2 | 8,0  | 0,001 | 51,2 | 2,1  | 1,5 | 43,1 | 6,5  | 0,000 | 20,8 |
| 233 | 29,3 | 8,1 | 10,5 | 0,3  | 0,016 | -2,8 | 47,9 | 4,2 | 13,5 | 1,4  | 0,000 | -3,5 |
| 144 | 0,6  | 0,4 | 8,8  | 3,5  | 0,015 | 13,9 | 1,1  | 0,8 | 7,6  | 2,1  | 0,008 | 6,9  |
| 221 | 0,7  | 0,3 | 4,7  | 1,5  | 0,010 | 7,3  | 0,4  | 0,3 | 3,8  | 0,5  | 0,001 | 9,2  |
| 172 | 0,7  | 0,0 | 9,4  | 3,5  | 0,013 | 13,9 | 0,4  | 0,1 | 6,7  | 3,0  | 0,022 | 16,9 |
| 95  | 40,6 | 4,5 | 9,4  | 1,9  | 0,000 | -4,3 | 38,0 | 5,5 | 8,4  | 3,2  | 0,001 | -4,5 |
| 220 | 0,7  | 0,4 | 10,2 | 1,7  | 0,001 | 14,3 | 0,6  | 0,5 | 18,2 | 0,8  | 0,000 | 31,0 |
| 106 | 1,3  | 0,3 | 25,4 | 2,2  | 0,000 | 20,0 | 1,9  | 0,7 | 19,0 | 2,4  | 0,000 | 10,0 |
| 253 | 0,4  | 0,3 | 4,2  | 0,1  | 0,000 | 9,3  | 0,8  | 0,3 | 3,4  | 0,6  | 0,002 | 4,5  |
| 164 | 0,5  | 0,3 | 8,4  | 0,5  | 0,000 | 17,4 | 0,4  | 0,2 | 1,8  | 0,5  | 0,007 | 5,0  |
| 179 | 4,9  | 1,0 | 45,8 | 1,2  | 0,000 | 9,3  | 4,3  | 0,9 | 22,8 | 6,0  | 0,006 | 5,3  |
| 120 | 0,7  | 0,4 | 0,5  | 0,3  | 0,748 | -1,2 | 1,8  | 1,0 | 0,4  | 0,3  | 0,213 | -4,2 |
| 158 | 5,2  | 1,7 | 26,8 | 9,3  | 0,017 | 5,2  | 4,1  | 0,5 | 22,5 | 5,7  | 0,005 | 5,5  |
| 175 | 0,5  | 0,0 | 4,2  | 0,4  | 0,000 | 7,7  | 0,6  | 0,1 | 2,9  | 0,4  | 0,001 | 4,9  |
| 185 | 0,9  | 0,2 | 10,9 | 2,2  | 0,002 | 12,7 | 0,9  | 0,2 | 9,5  | 3,6  | 0,015 | 11,0 |
| 226 | 1,0  | 0,2 | 3,8  | 0,6  | 0,002 | 3,7  | 0,4  | 0,1 | 3,8  | 0,8  | 0,002 | 10,6 |
| 266 | 0,9  | 0,3 | 26,5 | 15,8 | 0,140 | 30,7 | 1,6  | 0,7 | 32,7 | 8,7  | 0,003 | 21,1 |
| 103 | 2,3  | 0,1 | 7,3  | 0,6  | 0,000 | 3,2  | 1,5  | 0,1 | 5,3  | 0,1  | 0,000 | 3,6  |
| 220 | 0,7  | 0,4 | 3,5  | 2,1  | 0,265 | 4,7  | 0,8  | 0,5 | 4,7  | 2,8  | 0,184 | 5,6  |
| 278 | 2,0  | 1,3 | 48,0 | 12,1 | 0,003 | 24,6 | 1,6  | 0,5 | 50,3 | 13,5 | 0,003 | 31,5 |
| 187 | 0,7  | 0,4 | 4,2  | 2,1  | 0,041 | 6,3  | 0,6  | 0,4 | 5,0  | 2,9  | 0,159 | 8,1  |
| 236 | 9,2  | 5,3 | 37,1 | 5,4  | 0,002 | 4,0  | 4,5  | 3,7 | 34,8 | 9,1  | 0,006 | 7,7  |
| 187 | 10,4 | 4,6 | 26,3 | 4,1  | 0,011 | 2,5  | 2,7  | 1,6 | 29,2 | 9,0  | 0,007 | 10,9 |
| 188 | 34,2 | 3,8 | 80,0 | 16,0 | 0,009 | 2,3  | 9,8  | 1,6 | 81,3 | 9,7  | 0,000 | 8,3  |
| 156 | 3,3  | 0,4 | 21,9 | 0,4  | 0,000 | 6,7  | 3,0  | 0,5 | 19,4 | 1,0  | 0,000 | 6,4  |
| 192 | 0,7  | 0,3 | 6,5  | 0,9  | 0,001 | 8,7  | 0,8  | 0,2 | 6,7  | 0,2  | 0,000 | 8,6  |
| 229 |      | 0,0 | 2,8  | 1,6  | 0,119 |      | 0,8  | 0,4 | 3,8  | 2,2  | 0,190 | 5,1  |
