# Supplementary material for: iGentifier: indexing and large-scale profiling of unknown transcriptomes
Source: PubMed Central journal article supplement — Nucleic Acids Res. 2007 Jun 25;35(14):4640–8. doi: 10.1093/nar/gkm331 (PMC1950539; doi:10.1093/nar/gkm331), 2007-06-25
Supplement: nar_gkm331_2.pdf [file nar_gkm331_2.pdf]

## Regulation events in Ingrid BC *mlo5*

| Match ID | Signature           | Description                                                                                                                                           |
|----------|---------------------|-------------------------------------------------------------------------------------------------------------------------------------------------------|
| 1828968  | AGCTAGAAGGGATGCGCC  |                                                                                                                                                       |
| 1829018  | AGCTCTSATGCTCAGACG  | putative asparaginyl-tRNA synthetase [Oryza sativa (japonica cultivar-group)] dbj BAB61140.1  putative asparaginyl-tRNA synthetase                    |
| 1829806  | AGCTATGGCCACGTAGTT  | UDP-D-glucuronate decarboxylase [Hordeum vulgare] ---- 78 0.0 AAT80327.1                                                                              |
| 1831156  | AGCTAGACACTATGGATA  | chitinase (EC 3.2.1.14) cht2b precursor - barley emb CAA55345.1  chitinase [Hordeum vulgare subsp. vulgare] ---- 67 1e-146 S4884                      |
| 1831606  | AGCTCGAGCAGCAGAGGC  | Putative phosphoribosylanthranilate transferase [Oryza sativa (japonica cultivar-group)] ---- 30 0.0 AAM19104.1                                       |
| 1831791  | AGCTATRGAATTGTTGTT  |                                                                                                                                                       |
| 1831833  | AGCTGGGRTAATTAGTTN  | OSJNBa0042I15.10 [Oryza sativa (japonica cultivar-group)] ---- 1 1e-16 CAE04888.2                                                                     |
| 1832731  | AGCTGTTTGTGCMCTATN  | putative calmodulin [Oryza sativa (japonica cultivar-group)] ---- 4 1e-71 AAP13012.1                                                                  |
| 1834088  | AGCTCTGTACACAGCAAG  | dnaJ protein homolog-like [Oryza sativa (japonica cultivar-group)] dbj BAD09951.1  dnaJ protein homolog-like [Oryza sativa (japonica cultivar-group)] |
| 1834509  | AGCTGTACGTCACCCCTA  |                                                                                                                                                       |
| 1834600  | AGCTCAGGRCGACCCNA   |                                                                                                                                                       |
| 1834800  | AGCTGCNTGACGCCYCCC  |                                                                                                                                                       |
| 1834823  | AGCTGAGTTTATGTGTCT  | P0697C12.13 [Oryza sativa (japonica cultivar-group)] dbj BAB64678.1  P0697C12.13 [Oryza sativa (japonica cultivar-group)] ---- 44                     |
| 1835026  | AGCTTGCCATCTACAMGA  | putative cytochrome P450 [Hordeum vulgare subsp. vulgare] ---- 2 2e-80 CAD42637.1                                                                     |
| 1835369  | AGCTAAGAMAACCGCCAA  |                                                                                                                                                       |
| 1835893  | AGCTCTGGGATCCGCTCG  | unknown protein [Oryza sativa (japonica cultivar-group)] gb AAG46152.1  unknown protein [Oryza sativa] gb AAP55199.1  unknown                         |
| 1836135  | AGCTGCSSGAGAGGAGCC  | P0666G04.17 [Oryza sativa (japonica cultivar-group)] dbj BAB32915.1  P0666G04.17 [Oryza sativa (japonica cultivar-group)] ---- 1 0                    |
| 1836231  | AGCTACGGCCCGTTCGGG  | high light protein [Hordeum vulgare] ---- 11 4e-91 AAP87359.1                                                                                         |
| 1836373  | AGCTGTGGAACGACAACA  | RNA-directed RNA polymerase - common tobacco emb CAA09697.1  RNA-directed RNA polymerase [Nicotiana tabacum] ---- 1 2e-8                              |
| 1836426  | AGCTTGTTACCTGTTGAAT | cold acclimation protein WCOR413 - wheat gb AAB18207.1  cold acclimation protein WCOR413 [Triticum aestivum] ---- 1 1e-55 T06                         |
| 1837000  | AGCTCANGGCATGCGTGC  | lipid transfer protein, putative [Arabidopsis thaliana] gb AAF78376.1  T10O22.25 [Arabidopsis thaliana] ref NP_173264.1  protease inhibitor           |
| 1837039  | AGCTGGGGGTATTTTCTT  |                                                                                                                                                       |
| 1837254  | AGCTGTAGATAGAGGAGT  | OSJNBa0013K16.5 [Oryza sativa (japonica cultivar-group)] ---- 1 1e-24 CAE03756.1                                                                      |
| 1837269  | AGCTAGWAAAAGGTGKCA  |                                                                                                                                                       |
| 1837395  | AGCTTGTTTCAMGTTGTG  | ribosomal Pr 117 [Triticum aestivum] ---- 109 1e-74 AAP80667.1                                                                                        |
| 1837752  | AGCTGTGGAGAAGTCATC  | oxidoreductase, 2OG-Fe(II) oxygenase family protein [Arabidopsis thaliana] pir G86472 probable hyoscyamine 6-dioxygenase hydroxylase                  |
| 1838614  | AGCTGTGATTACTGCCGT  | plastocyanin-like domain-containing protein [Arabidopsis thaliana] sp Q9T076 ENL2_ARATH Early nodulin-like protein 2 precursor (F)                    |
| 1838620  | AGCTGCATGTGTATGTGT  | ENSANGP00000023986 [Anopheles gambiae] gb EAA12549.2  ENSANGP00000023986 [Anopheles gambiae str. PEST] ---- 1 .026                                    |
| 1838971  | AGCTAGCGGCTGGTTGGT  | OSJNBb0059K02.15 [Oryza sativa (japonica cultivar-group)] ---- 34 0.0 CAE04505.1                                                                      |
| 1839376  | AGCTGTCTGAACATTTCT  |                                                                                                                                                       |
| 1839613  | AGCTGGAYCTCATCTTCT  |                                                                                                                                                       |

| <b>Fragm.<br/>size (bp)</b> | <b>mlo5<br/>Contr<br/>mean</b> | <b>mlo6<br/>Contr<br/>SD</b> | <b>mlo5<br/>Inf<br/>mean</b> | <b>mlo5<br/>Inf<br/>SD</b> | <b>mlo5<br/>p (t-test)</b> | <b>mlo5<br/>Regul.<br/>factor</b> | <b>Mlo<br/>Contr<br/>mean</b> | <b>Mlo<br/>Contr<br/>SD</b> | <b>Mlo<br/>Inf<br/>mean</b> | <b>Mlo<br/>Inf<br/>SD</b> | <b>Mlo<br/>p (t-test)</b> | <b>Mlo<br/>Regul.<br/>factor</b> |
|-----------------------------|--------------------------------|------------------------------|------------------------------|----------------------------|----------------------------|-----------------------------------|-------------------------------|-----------------------------|-----------------------------|---------------------------|---------------------------|----------------------------------|
| 197                         | 2,5                            | 1,2                          | 26,2                         | 6,391                      | 0,003                      | 10,6                              | 1,5                           | 0,6                         | 18,3                        | 5,4                       | 0,006                     | 12,5                             |
| 236                         | 1,4                            | 0,5                          | 7,9                          | 3,021                      | 0,021                      | 5,8                               | 1,8                           | 0,8                         | 7,7                         | 2,8                       | 0,027                     | 4,2                              |
| 196                         | 8,9                            | 1,2                          | 38,3                         | 7,229                      | 0,002                      | 4,3                               | 8,1                           | 0,9                         | 25,8                        | 5,4                       | 0,005                     | 3,2                              |
| 242                         | 1,6                            | 0,1                          | 26,0                         | 11,419                     | 0,021                      | 16,5                              | 1,7                           | 1,4                         | 14,5                        | 9,7                       | 0,207                     | 8,5                              |
| 375                         | 0,8                            | 0,5                          | 5,3                          | 3,241                      | 0,066                      | 6,3                               | 10,6                          | 6,4                         | 42,3                        | 7,4                       | 0,005                     | 4,0                              |
| 188                         | 1,1                            | 0,4                          | 5,5                          | 0,709                      | 0,001                      | 4,8                               | 0,8                           | 0,5                         | 3,9                         | 0,7                       | 0,002                     | 4,8                              |
| 156                         | 2,1                            | 0,6                          | 37,7                         | 10,015                     | 0,004                      | 17,9                              | 1,1                           | 1,0                         | 35,5                        | 8,1                       | 0,002                     | 33,2                             |
| 120                         | 4,4                            | 2,6                          | 0,8                          | 0,583                      | 0,187                      | -5,6                              | 3,6                           | 2,6                         | 1,1                         | 0,6                       | 0,136                     | -3,2                             |
| 180                         | 29,1                           | 3,3                          | 5,1                          | 2,329                      | 0,000                      | -5,7                              | 16,5                          | 4,5                         | 5,2                         | 3,1                       | 0,015                     | -3,2                             |
| 183                         | 7,9                            | 2,0                          | 62,2                         | 18,064                     | 0,007                      | 7,8                               | 11,4                          | 2,2                         | 47,6                        | 6,1                       | 0,001                     | 4,2                              |
| 247                         | 2,0                            | 1,1                          | 15,8                         | 6,197                      | 0,019                      | 7,9                               | 1,6                           | 0,5                         | 21,8                        | 10,8                      | 0,032                     | 13,3                             |
| 166                         | 7,1                            | 0,9                          | 1,6                          | 0,310                      | 0,001                      | -4,4                              | 2,9                           | 0,4                         | 1,2                         | 0,3                       | 0,005                     | -2,5                             |
| 145                         | 4,4                            | 2,7                          | 44,4                         | 6,893                      | 0,001                      | 10,1                              | 4,2                           | 2,5                         | 37,7                        | 5,2                       | 0,001                     | 9,1                              |
| 235                         | 0,7                            | 0,0                          | 13,8                         | 3,303                      | 0,002                      | 20,4                              | 0,6                           | 0,1                         | 10,3                        | 2,8                       | 0,004                     | 17,8                             |
| 174                         | 0,9                            | 0,4                          | 9,5                          | 3,199                      | 0,010                      | 10,6                              | 0,7                           | 0,2                         | 8,8                         | 2,9                       | 0,008                     | 11,9                             |
| 288                         | 1,3                            | 0,7                          | 12,0                         | 4,631                      | 0,017                      | 9,2                               | 1,5                           | 0,5                         | 12,7                        | 4,5                       | 0,013                     | 8,5                              |
| 221                         | 12,4                           | 2,5                          | 2,3                          | 0,860                      | 0,003                      | -5,4                              | 7,7                           | 2,1                         | 2,7                         | 1,0                       | 0,020                     | -2,9                             |
| 302                         | 39,4                           | 7,7                          | 5,5                          | 1,985                      | 0,002                      | -7,2                              | 27,0                          | 8,4                         | 11,1                        | 4,5                       | 0,044                     | -2,4                             |
| 212                         | 2,1                            | 0,4                          | 42,8                         | 7,512                      | 0,001                      | 20,8                              | 1,5                           | 0,8                         | 34,8                        | 10,1                      | 0,005                     | 22,8                             |
| 161                         | 16,8                           | 4,2                          | 2,3                          | 0,552                      | 0,004                      | -7,2                              | 16,5                          | 4,9                         | 2,6                         | 1,0                       | 0,008                     | -6,3                             |
| 216                         | 3,0                            | 0,6                          | 14,7                         | 2,013                      | 0,001                      | 4,9                               | 1,3                           | 0,9                         | 19,2                        | 2,6                       | 0,000                     | 14,8                             |
| 256                         | 17,5                           | 1,0                          | 4,4                          | 1,232                      | 0,000                      | -4,0                              | 17,5                          | 4,6                         | 5,0                         | 1,1                       | 0,010                     | -3,5                             |
| 121                         | 3,8                            | 0,6                          | 0,4                          | 0,035                      | 0,001                      | -10,8                             | 4,6                           | 0,9                         | 0,7                         | 0,1                       | 0,002                     | -6,9                             |
| 112                         | 4,4                            | 0,9                          | 13,9                         | 2,307                      | 0,003                      | 3,1                               | 3,9                           | 1,0                         | 1,9                         | 0,5                       | 0,036                     | -2,1                             |
| 256                         | 9,2                            | 8,7                          | 1,8                          | 1,059                      | 0,191                      | -5,0                              | 5,1                           | 3,5                         | 6,6                         | 4,3                       | 0,770                     | 1,3                              |
| 182                         | 1,7                            | 0,4                          | 10,3                         | 1,467                      | 0,001                      | 5,9                               | 1,6                           | 0,4                         | 5,2                         | 1,3                       | 0,011                     | 3,3                              |
| 154                         | 0,9                            | 0,3                          | 16,5                         | 4,509                      | 0,004                      | 17,6                              | 0,9                           | 0,3                         | 18,7                        | 4,0                       | 0,002                     | 20,2                             |
| 160                         | 16,0                           | 2,6                          | 3,6                          | 0,675                      | 0,001                      | -4,4                              | 15,3                          | 3,5                         | 3,2                         | 0,9                       | 0,004                     | -4,8                             |
| 231                         | 7,1                            | 3,8                          | 46,0                         | 12,717                     | 0,007                      | 6,4                               | 6,2                           | 1,3                         | 25,1                        | 7,5                       | 0,013                     | 4,0                              |
| 299                         | 0,5                            | 0,2                          | 6,6                          | 3,474                      | 0,038                      | 14,4                              | 0,6                           | 0,1                         | 6,8                         | 3,8                       | 0,046                     | 12,0                             |
| 192                         | 0,5                            | 0,3                          | 11,8                         | 4,570                      | 0,013                      | 22,5                              | 0,6                           | 0,3                         | 8,6                         | 3,2                       | 0,012                     | 15,1                             |

1839658 AGCTGGGGTTGGGTTGAT P0683B11.14 [Oryza sativa (japonica cultivar-group)] dbj|BAB89826.1| P0683B11.14 [Oryza sativa (japonica cultivar-group)] ---- 3 3e-91 S57789  
1840413 AGCTGCNNGTCTGGTCTC hypothetical protein (clone ES2A) - barley emb|CAA55976.1| ES2A [Hordeum vulgare] ---- 103 1e-91 S57789  
1840414 AGCTGTGCGYCTGGCCTC  
1840566 AGCTGCATTAGTTGGTCT putative ribosomal protein [Oryza sativa (japonica cultivar-group)] gb|AAS01983.1| putative ribosomal protein [Oryza sativa (japonica cultivar-group)] gb|AAS01983.1  
1840676 AGCTGCACAAAAGTAAGC unnamed protein product [Oryza sativa (japonica cultivar-group)] sp|P83649|SRS1\_ORYSA Salt-stress root protein RS1 dbj|BAA965  
1840808 AGCTACAGGTGAGTTAAG  
1840813 AGCTATAAGTAGCCACAC  
1840859 AGCTAGGCATACGTAGTT beta-ketoacyl-CoA synthase, putative [Arabidopsis thaliana] pir|T00951|probable 3-oxoacyl-[acyl-carrier-protein] synthase (EC 2.3.1.1)  
1840983 AGCTACACRAGYCTGAAG  
1841374 AGCTTCGAATNCTTGGTG glutathione transferase F5 [Triticum aestivum] ---- 171 1e-108 CAD29478.1  
1842075 AGCTGACTAACTGCTAAT deoxynucleoside kinase family [Arabidopsis thaliana] ---- 11 1e-169 NP\_565032.2  
1842173 AGCTCGTACSCNACCGTC  
1842273 AGCTCAACTGGCTACATG ----  
1842512 AGCTCGGGAACATCARTT  
1842864 AGCTGTATGTAAAGTRNC putative alpha-galactosidase preproprotein [Oryza sativa (japonica cultivar-group)] dbj|BAB12570.1| alpha-galactosidase [Oryza sativa (japonica cultivar-group)] dbj|BAB12570.1  
1843597 AGCTGTGTNCTGTGTAGG GDP dissociation inhibitor protein - rice gb|AAB69870.1| GDP dissociation inhibitor protein OsGDI1 [Oryza sativa] ---- 60 0.0 T02030  
1844079 AGCTACTGGTGGATTAGT putative arm repeat-containing protein [Oryza sativa (japonica cultivar-group)] ---- 7 1e-170 BAD09539.1  
1844418 AGCTGTGTCTTGATGATA expressed protein [Arabidopsis thaliana] pir|A86350|F8K7.10 protein - Arabidopsis thaliana ---- 14 2e-89 NP\_564147.1  
1844479 AGCTGTGTGTGTTGGTCC  
1844494 AGCTCGGCAGATATNGGN bHLH transcription factor(GBOF-1)-like [Oryza sativa (japonica cultivar-group)] ---- 4 3e-68 BAC75416.1  
1844640 AGCTGGCGATGATCTATG pathogenesis-related protein 4 - barley emb|CAA71773.1| pathogenesis-related protein [Hordeum vulgare] ---- 1 0.002 T06171  
1845187 AGCTCTTGGACTCCAAGA putative B12D protein [Oryza sativa (japonica cultivar-group)] ---- 17 2e-35 BAC84633.1  
1845226 AGCTTCCTATGGGCACCC putative kinase [Oryza sativa (japonica cultivar-group)] gb|AAL58279.1| putative kinase [Oryza sativa (japonica cultivar-group)] gb|AAL58279.1  
1845545 AGCTACCDGTTTGACAAG  
1845546 AGCTTACTGTTTGACTAG blue copper binding protein [Hordeum vulgare subsp. vulgare] ---- 5 9e-70 CAE51320.1  
1846122 AGCTACACGAGCCNGAAG  
1846652 AGCTGGTAAATAGTGCTC OSJNBa0027P08.6 [Oryza sativa (japonica cultivar-group)] tpg|DAA01391.1| TPA: putative FRO-like protein [Oryza sativa (japonica cultivar-group)] tpg|DAA01391.1  
1847050 AGCTCAGCMAAACAGGC  
1847101 AGCTCTGTTCCCTTTTA  
1847592 AGCTTCATACACAATTGG translation initiation factor 3 [Oryza sativa (japonica cultivar-group)] ---- 39 1e-120 CAD24839.1  
1847840 AGCTAGACACGACGGACA  
1847866 AGCTAGCAGATTTAGTTG putative receptor kinase [Hordeum vulgare] ---- 2 1e-167 AAP31049.1  
1848268 AGCTCGGCATGANGGCCA putative nascent polypeptide associated complex alpha chain [Oryza sativa (japonica cultivar-group)] dbj|BAB89723.1| putative nascent polypeptide associated complex alpha chain [Oryza sativa (japonica cultivar-group)] dbj|BAB89723.1  
1848345 AGCTGAAGACCGACCGAT putative zinc finger transcription factor [Oryza sativa (japonica cultivar-group)] dbj|BAB12694.1| putative zinc finger transcription factor [Oryza sativa (japonica cultivar-group)] dbj|BAB12694.1  
1848385 AGCTCAACNGCCNGTCAG hydroxymethylglutaryl-CoA lyase, putative / 3-hydroxy-3-methylglutarate-CoA lyase, putative / HMG-CoA lyase, putative [Arabidopsis thaliana] pir|T00951|probable 3-oxoacyl-[acyl-carrier-protein] synthase (EC 2.3.1.1)

|     |      |      |      |        |       |       |      |     |      |      |       |       |
|-----|------|------|------|--------|-------|-------|------|-----|------|------|-------|-------|
| 152 | 3,4  | 0,7  | 0,4  | 0,190  | 0,002 | -7,8  | 1,6  | 0,7 | 0,7  | 0,1  | 0,098 | -2,2  |
| 166 | 2,1  | 1,1  | 31,8 | 11,722 | 0,012 | 15,4  | 1,3  | 0,7 | 29,2 | 10,9 | 0,012 | 22,7  |
| 165 | 1,1  | 0,2  | 10,9 | 1,453  | 0,000 | 9,8   | 0,9  | 0,1 | 10,2 | 1,8  | 0,001 | 10,9  |
| 217 | 27,0 | 0,3  | 2,5  | 1,246  | 0,000 | -10,6 | 17,8 | 0,6 | 3,4  | 0,7  | 0,000 | -5,2  |
| 309 | 3,9  | 0,8  | 0,4  | 0,080  | 0,002 | -9,7  | 3,4  | 0,7 | 0,5  | 0,2  | 0,002 | -6,3  |
| 162 | 1,3  | 0,2  | 8,1  | 2,804  | 0,014 | 6,3   | 1,8  | 0,9 | 7,1  | 2,1  | 0,016 | 3,9   |
| 157 | 2,4  | 0,5  | 22,6 | 2,324  | 0,000 | 9,6   | 2,9  | 0,7 | 15,2 | 2,6  | 0,001 | 5,3   |
| 121 | 0,8  | 0,6  | 12,1 | 4,293  | 0,011 | 15,2  | 1,4  | 0,4 | 15,5 | 4,2  | 0,005 | 11,0  |
| 155 | 2,2  | 0,8  | 33,0 | 15,953 | 0,029 | 15,0  | 2,2  | 0,8 | 16,7 | 7,1  | 0,025 | 7,5   |
| 134 | 0,8  | 0,4  | 8,7  | 2,583  | 0,006 | 11,0  | 0,6  | 0,3 | 5,9  | 2,9  | 0,030 | 10,7  |
| 141 | 6,7  | 1,3  | 26,8 | 2,770  | 0,000 | 4,0   | 5,9  | 0,8 | 24,7 | 3,3  | 0,001 | 4,2   |
| 131 | 2,3  | 0,9  | 42,2 | 9,305  | 0,002 | 18,1  | 2,7  | 1,0 | 30,2 | 2,8  | 0,000 | 11,4  |
| 221 | 2,5  | 0,3  | 13,3 | 3,529  | 0,006 | 5,3   | 0,8  | 0,3 | 15,7 | 4,2  | 0,004 | 19,2  |
| 108 | 0,4  | 0,2  | 2,4  | 0,765  | 0,012 | 5,8   | 0,4  | 0,1 | 4,5  | 0,7  | 0,000 | 12,3  |
| 140 | 9,9  | 0,4  | 2,3  | 0,549  | 0,000 | -4,2  | 10,8 | 1,3 | 2,0  | 0,3  | 0,000 | -5,5  |
| 223 | 25,4 | 4,0  | 5,8  | 0,935  | 0,001 | -4,4  | 18,3 | 3,6 | 9,1  | 1,8  | 0,017 | -2,0  |
| 146 | 4,0  | 0,6  | 20,9 | 2,813  | 0,001 | 5,2   | 3,2  | 1,1 | 15,3 | 2,8  | 0,002 | 4,8   |
| 200 | 8,3  | 2,1  | 1,6  | 0,462  | 0,006 | -5,2  | 3,4  | 2,2 | 1,9  | 0,5  | 0,811 | -1,8  |
| 153 | 11,0 | 4,3  | 1,9  | 0,751  | 0,023 | -5,6  | 8,8  | 6,0 | 2,2  | 0,8  | 0,353 | -4,0  |
| 140 | 7,3  | 0,2  | 1,5  | 0,211  | 0,000 | -4,7  | 6,2  | 3,6 | 1,7  | 0,1  | 0,318 | -3,6  |
| 249 | 0,8  | 0,4  | 32,9 | 12,916 | 0,013 | 41,4  | 1,5  | 0,9 | 41,7 | 13,3 | 0,006 | 27,9  |
| 241 | 0,8  | 0,2  | 49,5 | 7,338  | 0,000 | 58,4  | 0,3  | 0,1 | 48,7 | 7,3  | 0,000 | 152,7 |
| 203 | 8,3  | 1,2  | 2,0  | 0,301  | 0,001 | -4,2  | 4,9  | 0,9 | 2,6  | 0,3  | 0,012 | -1,9  |
| 219 | 2,1  | 1,0  | 13,0 | 2,739  | 0,003 | 6,1   | 1,5  | 0,4 | 18,0 | 5,9  | 0,009 | 12,0  |
| 220 | 4,1  | 0,4  | 57,2 | 14,160 | 0,003 | 14,0  | 2,3  | 0,4 | 74,2 | 9,3  | 0,000 | 32,3  |
| 155 | 0,6  | 0,3  | 53,3 | 35,384 | 0,062 | 85,4  | 0,4  | 0,1 | 40,1 | 31,8 | 0,097 | 90,9  |
| 234 | 37,9 | 12,4 | 5,9  | 1,209  | 0,011 | -6,5  | 36,6 | 8,3 | 9,8  | 2,8  | 0,006 | -3,7  |
| 148 | 0,8  | 0,1  | 36,5 | 10,829 | 0,005 | 46,2  | 1,0  | 0,6 | 28,9 | 8,1  | 0,004 | 28,4  |
| 109 | 5,9  | 0,5  | 1,0  | 0,158  | 0,000 | -6,2  | 6,4  | 2,6 | 1,0  | 0,1  | 0,023 | -6,3  |
| 214 | 1,8  | 0,7  | 0,4  | 0,014  | 0,027 | -4,9  | 1,1  | 0,2 | 0,9  | 0,3  | 0,308 | -1,3  |
| 165 | 0,3  | 0,0  | 15,9 | 7,332  | 0,021 | 47,4  | 0,3  | 0,1 | 6,1  | 2,8  | 0,024 | 18,9  |
| 145 | 6,2  | 0,7  | 1,2  | 0,216  | 0,000 | -5,0  | 3,9  | 0,6 | 1,3  | 0,3  | 0,002 | -3,0  |
| 106 | 4,7  | 0,3  | 18,0 | 0,820  | 0,000 | 3,8   | 8,4  | 1,1 | 10,0 | 1,8  | 0,267 | 1,2   |
| 264 | 5,0  | 1,7  | 0,6  | 0,132  | 0,011 | -8,1  | 7,0  | 2,1 | 1,1  | 0,3  | 0,009 | -6,3  |
| 299 | 4,3  | 1,0  | 0,7  | 0,156  | 0,004 | -5,9  | 4,6  | 1,1 | 1,9  | 0,3  | 0,015 | -2,5  |

1848433 AGCTACTGCCGCGCTGG cytochrome P450 [*Triticum aestivum*] ---- 7 1e-129 AAG17469.1  
1848539 AGCTGAGATAAGACAAYS  
1848585 AGCTGGTGTGYGTTGTCC hydroxyproline-rich glycoprotein DZ-HRGP [*Volvox carteri* f. *nagariensis*] ---- 11 1e-17 CAB62280.1  
1848638 AGCTGTCAAACCTCAATT putative glycoprotein [*Oryza sativa* (*japonica* cultivar-group)] dbj|BAB03604.1| putative glycoprotein [*Oryza sativa* (*japonica* cultivar-g  
1848639 AGCTKCCAACCTTCNATA  
1848748 AGCTGGTCGTCTATTTGC  
1848966 AGCTAAGGGCACGTAGTC  
1848988 AGCTGGCAAARMGAATAG putative rubisco subunit binding-protein alpha subunit precursor (60 kDa chaperonin alpha subunit) [*Oryza sativa* (*japonica* cultivar-g  
1849618 AGCTGGACCGAGCCAAGC expressed protein [*Arabidopsis thaliana*] gb|AAK59452.1| unknown protein [*Arabidopsis thaliana*] gb|AAL34162.1| unknown protein [  
1849644 AGCTGCCAGCACGAANGN ----  
1849678 AGCTCAAGCTTCACCGAC NADP malic enzyme [*Oryza sativa* (*japonica* cultivar-group)] ---- 76 0.0 AAQ99276.1  
1850101 AGCTSCAGCTGTCGATAA OSJNBa0086O06.9 [*Oryza sativa* (*japonica* cultivar-group)] ---- 23 1e-13 CAE04861.2  
1850117 AGCTGTCGATAATATGTT OSJNBa0086O06.9 [*Oryza sativa* (*japonica* cultivar-group)] ---- 23 1e-13 CAE04861.2  
1850852 AGCTGGATTATTTNNTCA ----  
1850879 AGCTGAGCAGTCSWCCGG putative putative glucosyltransferase [*Oryza sativa* (*japonica* cultivar-group)] gb|AAP53972.1| putative putative glucosyltransferase [(  
1850896 AGCTGTTCTGCATCGCGG subtilisin-like protein [*Toxoplasma gondii*] ---- 4 4e-05 AAK94670.1  
1851511 AGCTGTCTAGTGATNNGG  
1851616 AGCTGCTGCTACAAAGAA transmembrane protein [*Hordeum vulgare* subsp. *vulgare*] ---- 208 1e-164 CAA54233.1  
1851807 AGCTGCACGCACGTACTA lycopene beta-cyclase [*Zea mays*] ---- 25 8e-39 AAO18661.1  
1851844 AGCTGTTTGACCAACTGA  
1852485 AGCTGCGTAGTCGTCTCC  
1852719 AGCTGGCTATCANGGACN putative protein [*Oryza sativa*] ---- 6 7e-21 CAC39046.1  
1852840 AGCTGGTTAATAAGGTAG Tubulin alpha-1 chain emb|CAA67942.1| alpha-tubulin 1 [*Hordeum vulgare* subsp. *vulgare*] ---- 47 0.0 Q43473  
1852879 AGCTCAAAGTCGTTTTTTG  
1852904 AGCTNNATGGTCGGTCTT  
1852938 AGCTAGTGCCCGCTGCNA viviparous-14 protein - maize gb|AAB62181.1| viviparous-14 [*Zea mays*] ---- 2 2e-09 T04351  
1852948 AGCTGTAATAATTAATGGA germin-like protein - barley emb|CAA63659.1| oxalate oxidase-like protein or germin-like protein [*Hordeum vulgare* subsp. *vulgare*] --  
1853208 AGCTGAATTCAGCCTACN Beta-fructofuranosidase 1 precursor (Sucrose-6-phosphate hydrolase 1) (Invertase 1) ---- 2 1e-54 P49175  
1853453 AGCTAATCAGGAANCTRG putative glycine-rich protein [*Oryza sativa* (*japonica* cultivar-group)] dbj|BAD09471.1| putative glycine-rich protein [*Oryza sativa* (*japo*  
1853478 AGCTRACCGGGCTCGCCG Putative glycogenin [*Oryza sativa*] ---- 1 8e-19 AAK92624.1  
1853836 AGCTGGGACTGCANTTAT P0690B02.9 [*Oryza sativa* (*japonica* cultivar-group)] dbj|BAB84421.1| P0690B02.9 [*Oryza sativa* (*japonica* cultivar-group)] ---- 1 2e-1  
1853936 AGCTCCNCCCTGCTGTTT xyloglucan-specific fungal endoglucanase inhibitor protein precursor [*Lycopersicon esculentum*] ---- 1 4e-19 AAN87262.1  
1853952 AGCTTCNCGCTCTGGACC unnamed protein product [*Oryza sativa* (*japonica* cultivar-group)] dbj|BAA96170.1| unnamed protein product [*Oryza sativa* (*japonica*  
1854189 AGCTGCANCKACCAGCAT unknown [*Arabidopsis thaliana*] ---- 73 4e-68 AAN60225.1  
1854204 AGCTNACCCTCACCTNA

|     |      |      |      |       |       |       |      |      |      |      |       |      |
|-----|------|------|------|-------|-------|-------|------|------|------|------|-------|------|
| 347 | 0,8  | 0,3  | 37,9 | 7,351 | 0,001 | 49,3  | 1,1  | 0,4  | 38,7 | 2,2  | 0,000 | 33,8 |
| 231 | 23,6 | 3,3  | 4,4  | 0,775 | 0,001 | -5,3  | 14,5 | 0,6  | 6,5  | 0,7  | 0,000 | -2,2 |
| 190 | 27,7 | 10,0 | 2,0  | 0,523 | 0,011 | -13,9 | 16,4 | 6,8  | 2,9  | 0,7  | 0,026 | -5,7 |
| 148 | 10,2 | 1,7  | 1,8  | 0,832 | 0,002 | -5,8  | 6,9  | 1,5  | 3,7  | 0,9  | 0,038 | -1,9 |
| 147 | 2,8  | 0,5  | 16,4 | 6,945 | 0,028 | 5,9   | 1,4  | 0,2  | 10,2 | 3,2  | 0,009 | 7,2  |
| 219 | 1,1  | 0,2  | 6,8  | 1,319 | 0,002 | 6,1   | 0,8  | 0,2  | 8,8  | 0,9  | 0,000 | 10,4 |
| 204 | 0,8  | 0,2  | 39,2 | 5,475 | 0,000 | 50,8  | 1,1  | 0,2  | 40,7 | 4,2  | 0,000 | 36,3 |
| 184 | 0,4  | 0,2  | 4,8  | 1,662 | 0,011 | 11,4  | 0,6  | 0,0  | 6,4  | 1,8  | 0,005 | 11,5 |
| 240 | 1,6  | 0,7  | 16,3 | 7,379 | 0,027 | 10,0  | 2,1  | 0,5  | 8,2  | 6,8  | 0,196 | 3,9  |
| 262 | 0,9  | 0,2  | 8,1  | 1,846 | 0,003 | 9,4   | 0,9  | 0,1  | 8,4  | 0,9  | 0,000 | 9,2  |
| 290 | 1,8  | 1,1  | 21,6 | 3,535 | 0,001 | 11,8  | 2,4  | 0,6  | 20,2 | 3,9  | 0,001 | 8,5  |
| 194 | 8,3  | 1,5  | 33,1 | 1,034 | 0,000 | 4,0   | 8,4  | 1,9  | 19,5 | 1,3  | 0,001 | 2,3  |
| 188 | 4,2  | 0,7  | 21,5 | 1,309 | 0,000 | 5,1   | 2,4  | 0,6  | 13,2 | 1,1  | 0,000 | 5,6  |
| 249 | 34,7 | 3,5  | 8,4  | 1,917 | 0,000 | -4,1  | 1,0  | 0,6  | 1,5  | 0,9  | 0,813 | 1,4  |
| 228 | 1,9  | 0,6  | 25,0 | 3,275 | 0,000 | 13,0  | 1,5  | 0,1  | 19,7 | 1,6  | 0,000 | 12,9 |
| 214 | 2,0  | 0,6  | 12,7 | 1,078 | 0,000 | 6,5   | 1,6  | 0,3  | 10,2 | 1,3  | 0,000 | 6,3  |
| 235 | 2,1  | 0,7  | 20,3 | 4,044 | 0,002 | 9,7   | 2,0  | 0,9  | 18,0 | 2,8  | 0,001 | 8,9  |
| 325 | 6,5  | 0,5  | 1,5  | 0,310 | 0,000 | -4,3  | 6,3  | 2,8  | 2,2  | 1,7  | 0,098 | -2,8 |
| 157 | 16,4 | 3,0  | 2,9  | 1,115 | 0,002 | -5,7  | 18,2 | 7,0  | 5,1  | 2,9  | 0,040 | -3,5 |
| 132 | 0,8  | 0,1  | 14,8 | 4,037 | 0,004 | 19,0  | 0,9  | 0,3  | 21,5 | 10,5 | 0,027 | 22,8 |
| 223 | 6,3  | 1,4  | 61,8 | 4,484 | 0,000 | 9,8   | 7,3  | 1,4  | 41,7 | 7,2  | 0,001 | 5,7  |
| 351 | 40,4 | 5,0  | 8,7  | 1,758 | 0,000 | -4,6  | 38,3 | 23,2 | 17,0 | 1,6  | 0,560 | -2,2 |
| 210 | 4,6  | 0,2  | 1,1  | 0,206 | 0,000 | -4,2  | 4,9  | 0,6  | 1,5  | 0,6  | 0,003 | -3,2 |
| 200 | 0,3  | 0,1  | 16,5 | 5,475 | 0,007 | 63,9  | 0,8  | 0,2  | 16,7 | 4,3  | 0,003 | 20,7 |
| 179 | 0,5  | 0,3  | 3,1  | 0,405 | 0,001 | 6,0   | 0,5  | 0,0  | 2,7  | 0,4  | 0,001 | 5,9  |
| 151 | 2,7  | 0,4  | 0,4  | 0,104 | 0,000 | -7,6  | 1,1  | 0,2  | 1,0  | 0,2  | 0,388 | -1,2 |
| 141 | 2,0  | 0,3  | 27,5 | 9,021 | 0,008 | 13,5  | 0,8  | 0,3  | 29,2 | 7,5  | 0,003 | 34,5 |
| 249 | 21,3 | 3,5  | 3,0  | 1,209 | 0,001 | -7,2  | 15,6 | 2,8  | 4,4  | 1,4  | 0,003 | -3,6 |
| 130 | 1,0  | 0,0  | 11,9 | 3,916 | 0,008 | 12,1  | 0,6  | 0,1  | 7,5  | 2,8  | 0,013 | 13,4 |
| 152 | 41,3 | 15,8 | 3,9  | 2,044 | 0,015 | -10,6 | 20,6 | 13,2 | 7,6  | 3,4  | 0,174 | -2,7 |
| 179 | 31,5 | 1,2  | 5,5  | 0,835 | 0,000 | -5,7  | 18,1 | 2,6  | 10,4 | 1,2  | 0,010 | -1,7 |
| 273 | 3,6  | 0,2  | 29,2 | 4,886 | 0,001 | 8,1   | 2,8  | 0,9  | 20,9 | 5,7  | 0,006 | 7,6  |
| 287 | 49,1 | 6,2  | 9,5  | 1,429 | 0,000 | -5,2  | 26,7 | 5,4  | 16,4 | 2,6  | 0,040 | -1,6 |
| 241 | 4,2  | 0,2  | 1,0  | 0,223 | 0,000 | -4,1  | 3,9  | 0,5  | 1,4  | 0,1  | 0,002 | -2,8 |
| 254 | 2,4  | 0,4  | 0,5  | 0,004 | 0,001 | -4,8  | 2,6  | 0,7  | 0,9  | 0,1  | 0,013 | -2,8 |

1854211 AGCTCAGCCAGGCACTGT OSJNBa0088H09.6 [Oryza sativa (japonica cultivar-group)] ---- 10 0.0 CAE03448.1  
1854441 AGCTCATGTATCATCACA ----  
1854460 AGCTCAAGCATGTTGACG nucleoid DNA-binding protein cnd41, chloroplast - common tobacco dbj|BAA22813.1| CND41, chloroplast nucleoid DNA binding prot  
1854762 AGCTGCAGCACTACTGTC P0435H01.26 [Oryza sativa (japonica cultivar-group)] dbj|BAB63530.1| P0435H01.26 [Oryza sativa (japonica cultivar-group)] ---- 3 5  
1854963 AGCTACGCCAGATGAACG  
1855320 AGCTTANNATATTATTGA blue copper binding protein [Hordeum vulgare subsp. vulgare] ---- 17 3e-69 CAE51320.1  
1855748 AGCTATGCGAAGGACGAC thaumatin-like protein TLP7 [Hordeum vulgare] ---- 9 9e-74 AAK55325.1  
1855882 AGCTGCACGGTGGCACGC  
1856439 AGCTCCTGGCAGTTTTGA  
1856474 AGCTGGCTTCTGCTGCCG OSJNBb0065L13.14 [Oryza sativa (japonica cultivar-group)] emb|CAE03378.1| OSJNBa0004N05.2 [Oryza sativa (japonica cultivar-  
1857446 AGCTGAAGTGTGCATTGG P0686C03.22 [Oryza sativa (japonica cultivar-group)] ---- 3 5e-34 NP\_913886.1  
1857527 AGCTGACAAGGCTCGCCA putative cyclic nucleotide and calmodulin-regulated ion channel protein [Hordeum vulgare subsp. vulgare] ---- 1 3e-13 AAP38213.1  
1858326 AGCTACTAMAAAGTNAAG Hypothetical protein [Oryza sativa (japonica cultivar-group)] ---- 2 2e-29 AAN05510.1  
1858483 AGCTGCCATGGTAGTAGC OSJNBa0071I13.13 [Oryza sativa (japonica cultivar-group)] ---- 10 1e-63 CAE03412.3  
1858509 AGCTGTCNCTGCGAAGNA putative gibberellin 20-oxidase [Oryza sativa (japonica cultivar-group)] ---- 19 1e-141 NP\_922402.1  
1858811 AGCTACTATAGGACTTGC putative LHY protein [Oryza sativa (japonica cultivar-group)] ---- 3 1e-67 BAC99516.1  
1858829 AGCTCACCGCCGCTGCC tonoplast intrinsic protein gamma - barley emb|CAA56553.1| gamma-TIP-like protein [Hordeum vulgare subsp. vulgare] ---- 4 2e-75  
1858951 AGCTTMVATCGATTATCC  
1859185 AGCTCCGAYAACAATTCA putative ethylene-inducible protein [Oryza sativa (japonica cultivar-group)] ---- 45 1e-161 BAC84589.1  
1859395 AGCTCAGAAGCCTAATCT  
1859405 AGCTTCCAGTGCATTGCT Phenylalanine ammonia-lyase pir|T06545 phenylalanine ammonia-lyase (EC 4.3.1.5) - wheat emb|CAA68036.1| phenylalanine amn  
1859471 AGCTTATGTMTTGGTACA  
1859584 AGCTTCGAGGTANTGGCN  
1859885 AGCTGCAGATCAAGATGN unknown [environmental sequence] ---- 3 5e-09 EAE77593.1  
1860089 AGCTACGCCAGAKGNAGA  
1860184 AGCTAGCGATTCAYCATC putative glycine-rich protein [Oryza sativa (japonica cultivar-group)] dbj|BAD09471.1| putative glycine-rich protein [Oryza sativa (japo  
1860211 AGCTAAAACACGGTGCCA ER6 protein [Lycopersicon esculentum] ---- 19 3e-59 AAD46412.1  
1860637 AGCTGATCCCNCSGCCCA  
1860706 AGCTAAAACCAAGCGAGA general transcription factor III C 1 [Rattus norvegicus] pir|A56011 transcription factor IIIC alpha chain - rat ---- 1 .039 NP\_598225.1  
1860723 AGCTTGCCAANTTACCNA disease resistance protein Cf-2.1 - currant tomato gb|AAC15779.1| Cf-2.1 [Lycopersicon pimpinellifolium] ---- 1 2e-15 T10504  
1861132 AGCTGTACCACACCCAAM P0001B06.19 [Oryza sativa (japonica cultivar-group)] dbj|BAB16866.1| P0001B06.19 [Oryza sativa (japonica cultivar-group)] ---- 12  
1861239 AGCTTGGGGTTCGCTGGS OSJNBa0074L08.3 [Oryza sativa (japonica cultivar-group)] ---- 26 0.0 CAD41191.1  
1861368 AGCTGAGTTGCGTAGGTA chloroplast nucleoid DNA-binding protein -like protein [Oryza sativa (japonica cultivar-group)] ---- 4 5e-17 BAC79194.1  
1861371 AGCTGAGGTGSGTTGGTA  
1861446 AGCTAGCACTCTGGTTCG

|     |      |     |      |        |       |       |      |      |      |      |       |       |
|-----|------|-----|------|--------|-------|-------|------|------|------|------|-------|-------|
| 261 | 2,9  | 1,1 | 26,6 | 2,075  | 0,000 | 9,2   | 3,5  | 1,6  | 28,5 | 1,9  | 0,000 | 8,1   |
| 173 | 1,0  | 0,2 | 46,9 | 6,378  | 0,000 | 47,2  | 0,7  | 0,3  | 22,6 | 3,4  | 0,000 | 30,9  |
| 156 | 52,1 | 6,3 | 11,4 | 3,057  | 0,001 | -4,6  | 53,6 | 10,5 | 13,2 | 2,9  | 0,003 | -4,1  |
| 204 | 15,8 | 0,6 | 2,2  | 0,251  | 0,000 | -7,3  | 9,5  | 0,2  | 4,1  | 0,4  | 0,000 | -2,3  |
| 225 | 32,7 | 6,2 | 4,2  | 0,590  | 0,001 | -7,8  | 30,2 | 4,4  | 10,1 | 0,7  | 0,001 | -3,0  |
| 243 | 4,0  | 2,0 | 49,0 | 16,558 | 0,010 | 12,1  | 4,9  | 2,5  | 52,1 | 15,3 | 0,006 | 10,6  |
| 300 | 0,4  | 0,3 | 28,2 | 3,445  | 0,000 | 68,2  | 0,3  | 0,0  | 17,8 | 13,0 | 0,080 | 57,7  |
| 198 | 11,8 | 1,9 | 2,0  | 0,606  | 0,001 | -5,8  | 11,0 | 3,3  | 3,0  | 0,5  | 0,014 | -3,7  |
| 221 | 2,4  | 0,5 | 33,6 | 7,405  | 0,002 | 13,7  | 2,4  | 0,7  | 31,7 | 11,9 | 0,013 | 13,1  |
| 252 | 5,4  | 0,6 | 1,1  | 0,147  | 0,000 | -4,9  | 5,2  | 0,6  | 3,0  | 0,1  | 0,002 | -1,8  |
| 134 | 23,0 | 4,7 | 4,8  | 0,918  | 0,003 | -4,8  | 13,2 | 2,6  | 4,4  | 0,5  | 0,004 | -3,0  |
| 121 | 5,6  | 2,1 | 0,5  | 0,283  | 0,014 | -10,6 | 3,7  | 1,5  | 1,4  | 0,9  | 0,049 | -2,7  |
| 142 | 0,6  | 0,1 | 8,5  | 1,365  | 0,001 | 14,7  | 0,5  | 0,1  | 7,8  | 2,0  | 0,003 | 14,6  |
| 280 | 11,8 | 4,2 | 1,3  | 0,597  | 0,013 | -9,2  | 9,3  | 3,6  | 3,3  | 1,2  | 0,051 | -2,8  |
| 301 | 1,7  | 0,4 | 11,7 | 2,948  | 0,004 | 6,9   | 7,2  | 2,6  | 16,8 | 2,3  | 0,009 | 2,3   |
| 273 | 28,7 | 3,2 | 4,0  | 2,320  | 0,000 | -7,1  | 39,1 | 10,8 | 5,6  | 2,3  | 0,006 | -6,9  |
| 256 | 22,4 | 9,2 | 2,1  | 0,999  | 0,019 | -10,6 | 11,1 | 4,4  | 2,6  | 0,7  | 0,031 | -4,3  |
| 168 | 14,4 | 9,8 | 1,9  | 0,828  | 0,092 | -7,6  | 8,1  | 7,0  | 2,5  | 1,6  | 0,198 | -3,2  |
| 245 | 2,4  | 1,8 | 15,1 | 1,477  | 0,001 | 6,2   | 2,0  | 1,2  | 9,6  | 1,1  | 0,001 | 4,7   |
| 175 | 0,5  | 0,1 | 4,1  | 0,699  | 0,001 | 8,5   | 0,5  | 0,2  | 3,3  | 1,9  | 0,065 | 6,7   |
| 170 | 10,5 | 6,6 | 75,0 | 8,423  | 0,000 | 7,2   | 10,7 | 3,9  | 42,8 | 25,4 | 0,096 | 4,0   |
| 119 | 2,6  | 0,3 | 8,4  | 1,098  | 0,001 | 3,2   | 2,6  | 1,3  | 22,5 | 3,0  | 0,000 | 8,6   |
| 250 | 10,7 | 0,7 | 1,4  | 0,096  | 0,000 | -7,7  | 11,0 | 2,2  | 2,5  | 0,5  | 0,003 | -4,3  |
| 107 | 16,8 | 1,1 | 1,8  | 0,252  | 0,000 | -9,1  | 13,2 | 1,8  | 2,3  | 0,6  | 0,001 | -5,9  |
| 221 | 6,3  | 3,6 | 0,8  | 0,034  | 0,060 | -7,5  | 7,4  | 2,9  | 2,7  | 0,7  | 0,056 | -2,7  |
| 147 | 1,6  | 0,1 | 11,1 | 1,275  | 0,000 | 7,0   | 1,0  | 0,2  | 4,8  | 1,0  | 0,003 | 4,8   |
| 127 | 22,4 | 4,3 | 5,4  | 0,911  | 0,002 | -4,2  | 20,1 | 3,2  | 5,8  | 0,8  | 0,002 | -3,5  |
| 136 | 1,2  | 0,4 | 10,0 | 2,664  | 0,005 | 8,6   | 1,6  | 0,3  | 5,8  | 1,7  | 0,014 | 3,6   |
| 216 | 32,2 | 6,4 | 6,7  | 1,408  | 0,002 | -4,8  | 15,8 | 3,9  | 8,2  | 2,3  | 0,043 | -1,9  |
| 92  | 0,9  | 0,5 | 55,5 | 9,223  | 0,001 | 59,0  | 0,3  | 0,1  | 68,4 | 13,4 | 0,001 | 260,7 |
| 134 | 9,5  | 0,6 | 0,8  | 0,176  | 0,000 | -11,9 | 20,4 | 1,3  | 4,4  | 0,6  | 0,000 | -4,6  |
| 226 | 31,9 | 2,7 | 7,2  | 2,142  | 0,000 | -4,5  | 24,4 | 2,0  | 14,1 | 2,8  | 0,007 | -1,7  |
| 206 | 47,9 | 3,8 | 10,7 | 4,300  | 0,000 | -4,5  | 19,3 | 7,6  | 13,1 | 6,0  | 0,335 | -1,5  |
| 207 | 0,5  | 0,2 | 2,4  | 0,386  | 0,002 | 4,5   | 1,0  | 0,3  | 3,1  | 0,3  | 0,001 | 3,3   |
| 223 | 2,0  | 0,1 | 0,3  | 0,159  | 0,000 | -6,1  | 0,8  | 0,1  | 0,6  | 0,0  | 0,035 | -1,5  |



|         |                      |                                                                                                                                            |
|---------|----------------------|--------------------------------------------------------------------------------------------------------------------------------------------|
| 1861808 | AGCTGTACAASGGNGTCT   |                                                                                                                                            |
| 1861826 | AGCTGTCTGTGTCAGCCTGN | OSJNBa0036B21.4 [Oryza sativa (japonica cultivar-group)] emb CAE02577.2  OSJNBa0006M15.20 [Oryza sativa (japonica cultivar-                |
| 1862138 | AGCTSAGYTACCCCGCCT   |                                                                                                                                            |
| 1862158 | AGCTGAACCCRGAAGCAC   | calcium-binding EF hand family protein [Arabidopsis thaliana] emb CAC05499.1  EF-hand Calcium binding protein-like [Arabidopsis t          |
| 1862248 | AGCTGGCCGANTCATCWTC  | putative protein kinase [Arabidopsis thaliana] ---- 5 1e-22 AAO00872.1                                                                     |
| 1862340 | AGCTCGCATTTTCGTGTGT  | pathogenesis-related protein 10 [Hordeum vulgare] ---- 1 2e-38 AAP04429.1                                                                  |
| 1863291 | AGCTGGGAGTGAAAAAGA   |                                                                                                                                            |
| 1863346 | AGCTCCGTGCGAATCGTG   | putative lipid transfer protein [Oryza sativa (japonica cultivar-group)] gb AAN05565.1  putative lipid transfer protein [Oryza sativa (jap |
| 1863353 | AGCTGGAGATGATCCTGA   | ----                                                                                                                                       |
| 1863722 | AGCTCAAGGAGTCTCTGG   | tryptophan synthase-related [Arabidopsis thaliana] dbj BAB10143.1  tryptophan synthase beta chain [Arabidopsis thaliana] gb AAL91          |
| 1863783 | AGCTGGGCATTGCC TAGA  |                                                                                                                                            |
| 1863966 | AGCTGACACTAGGAAGGA   |                                                                                                                                            |
| 1864682 | AGCTGTGGTGN TCTNGG   | protease inhibitor/seed storage/lipid transfer protein (LTP) family protein [Arabidopsis thaliana] ---- 12 8e-16 NP_565067.1               |
| 1865586 | AGCTMCACCASAGCGCAG   |                                                                                                                                            |
| 1865601 | AGCTGCATGTGCCTGTGC   | OSJNBa0043A12.4 [Oryza sativa (japonica cultivar-group)] ---- 2 1e-33 CAE02799.1                                                           |
| 1865669 | AGCTAGAAYTATCCACCT   |                                                                                                                                            |
| 1865844 | AGCTGCCATTTCTCTCT    | P0496H05.27 [Oryza sativa (japonica cultivar-group)] dbj BAB55695.1  P0468H06.6 [Oryza sativa (japonica cultivar-group)] ---- 1 2e         |
| 1866186 | AGCTCCNACTCAAGATAT   |                                                                                                                                            |
| 1866190 | AGCTAGAGTGATGTTGTC   |                                                                                                                                            |
| 1866202 | AGCTGAAAGTGARCCATC   |                                                                                                                                            |
| 1866544 | AGCTGAGAGAGAGAGGAA   | unknown protein [Oryza sativa (japonica cultivar-group)] ---- 27 2e-21 BAC79927.1                                                          |
| 1866575 | AGCTGATGACTAGCCTCG   | putative protein [Oryza sativa] ---- 12 0.0 AAK73132.1                                                                                     |
| 1866680 | AGCTGGCTGCGTGGTGCN   |                                                                                                                                            |
| 1866703 | AGCTGCAGGTGGAGATGG   | P0466H10.24 [Oryza sativa (japonica cultivar-group)] ---- 8 1e-120 BAC15791.1                                                              |
| 1866715 | AGCTGCCTGAAGGCTCCC   |                                                                                                                                            |
| 1866892 | AGCTAAGTAGACATGTTTC  |                                                                                                                                            |
| 1867003 | AGTCATGTAGCMAHTGA    | -partial [Oryza sativa (japonica cultivar-group)] ---- 2 .009 AAL86490.1                                                                   |
| 1867253 | AGCTGGAACCTATCTAGG   |                                                                                                                                            |
| 1867637 | AGCTTGCCAAC TTCCCN   |                                                                                                                                            |
| 1867640 | AGCTGCCNATTTCCCAN    |                                                                                                                                            |
| 1867836 | AGCTGATCTAACTTGAAT   |                                                                                                                                            |
| 1868378 | AGCTGTTTTGCTGTAGTC   | OSJNBa0089N06.15 [Oryza sativa (japonica cultivar-group)] ---- 7 3e-47 CAE04254.3                                                          |
| 1868767 | AGCTGCAAAACATGTANC   | putative phosphoribosyl pyrophosphate synthase [Oryza sativa (japonica cultivar-group)] dbj BAD08028.1  putative phosphoribosyl p          |
| 1868973 | AGCTGGGCACGGAANACT   |                                                                                                                                            |
| 1869018 | AGCTTGCM T AAGATGCW  | B1078G07.35 [Oryza sativa (japonica cultivar-group)] dbj BAB90213.1  B1078G07.35 [Oryza sativa (japonica cultivar-group)] dbj BA           |

|     |      |     |      |        |       |       |      |     |       |      |       |       |
|-----|------|-----|------|--------|-------|-------|------|-----|-------|------|-------|-------|
| 138 | 0,4  | 0,1 | 8,0  | 0,988  | 0,000 | 22,2  | 0,3  | 0,1 | 6,9   | 0,2  | 0,000 | 21,2  |
| 122 | 5,9  | 0,2 | 1,1  | 0,276  | 0,000 | -5,2  | 4,4  | 0,6 | 2,3   | 0,1  | 0,004 | -1,9  |
| 225 | 6,6  | 2,7 | 0,5  | 0,308  | 0,018 | -12,7 | 4,9  | 1,8 | 0,9   | 0,5  | 0,022 | -5,3  |
| 209 | 2,1  | 1,1 | 13,8 | 1,407  | 0,000 | 6,6   | 0,5  | 0,3 | 11,2  | 0,9  | 0,000 | 23,0  |
| 145 | 1,7  | 0,5 | 14,8 | 3,106  | 0,002 | 8,5   | 1,5  | 0,2 | 8,5   | 2,1  | 0,004 | 5,6   |
| 110 | 2,0  | 0,3 | 17,6 | 2,106  | 0,000 | 8,7   | 2,2  | 0,0 | 13,8  | 0,7  | 0,000 | 6,3   |
| 164 | 47,1 | 6,5 | 8,1  | 1,594  | 0,001 | -5,8  | 35,6 | 5,6 | 9,4   | 2,4  | 0,002 | -3,8  |
| 126 | 8,0  | 1,3 | 42,0 | 1,885  | 0,000 | 5,3   | 7,5  | 1,1 | 35,5  | 6,7  | 0,002 | 4,7   |
| 141 | 2,9  | 0,6 | 0,5  | 0,073  | 0,002 | -5,6  | 3,2  | 1,4 | 0,6   | 0,3  | 0,021 | -5,5  |
| 202 | 1,1  | 0,6 | 4,5  | 3,206  | 0,092 | 4,1   | 0,6  | 0,4 | 0,5   | 0,3  | 0,769 | -1,2  |
| 216 | 0,3  | 0,1 | 6,7  | 1,227  | 0,001 | 19,2  | 0,9  | 0,5 | 8,6   | 1,3  | 0,000 | 9,3   |
| 298 | 1,9  | 0,8 | 15,2 | 7,544  | 0,038 | 8,0   | 1,8  | 1,1 | 22,3  | 14,1 | 0,061 | 12,1  |
| 233 | 0,9  | 0,3 | 7,0  | 1,286  | 0,001 | 7,4   | 0,6  | 0,2 | 6,7   | 1,0  | 0,000 | 10,4  |
| 207 | 1,5  | 0,1 | 5,9  | 0,141  | 0,000 | 4,0   | 1,7  | 0,2 | 5,6   | 0,4  | 0,000 | 3,3   |
| 222 | 4,3  | 0,3 | 20,0 | 1,910  | 0,000 | 4,6   | 4,2  | 0,5 | 16,2  | 0,5  | 0,000 | 3,9   |
| 283 | 2,4  | 0,4 | 11,5 | 2,747  | 0,005 | 4,8   | 4,7  | 0,6 | 9,4   | 1,4  | 0,006 | 2,0   |
| 111 | 0,8  | 0,1 | 17,4 | 5,437  | 0,006 | 21,1  | 0,8  | 0,2 | 14,3  | 4,1  | 0,005 | 17,4  |
| 149 | 30,1 | 5,6 | 3,8  | 1,563  | 0,001 | -7,9  | 22,2 | 4,1 | 4,7   | 1,9  | 0,002 | -4,8  |
| 146 | 1,7  | 0,1 | 78,1 | 9,226  | 0,000 | 45,5  | 2,6  | 0,5 | 63,0  | 6,7  | 0,000 | 24,1  |
| 136 | 1,3  | 0,5 | 9,8  | 2,127  | 0,003 | 7,4   | 1,2  | 0,1 | 12,2  | 2,2  | 0,001 | 10,2  |
| 173 | 1,6  | 0,8 | 10,0 | 2,222  | 0,004 | 6,1   | 4,0  | 0,6 | 3,3   | 1,9  | 0,573 | -1,2  |
| 231 | 4,0  | 0,6 | 22,4 | 1,737  | 0,000 | 5,6   | 6,0  | 1,8 | 24,9  | 2,6  | 0,000 | 4,1   |
| 116 | 2,4  | 0,8 | 11,4 | 2,904  | 0,007 | 4,7   | 2,9  | 0,3 | 5,7   | 3,8  | 0,266 | 2,0   |
| 291 | 10,4 | 0,9 | 0,6  | 0,198  | 0,000 | -17,9 | 7,9  | 3,4 | 2,1   | 0,3  | 0,042 | -3,8  |
| 298 | 1,3  | 0,1 | 6,1  | 0,519  | 0,000 | 4,7   | 1,5  | 0,3 | 7,4   | 0,2  | 0,000 | 4,8   |
| 188 | 1,0  | 0,1 | 6,9  | 0,595  | 0,000 | 6,6   | 1,0  | 0,3 | 4,4   | 0,5  | 0,000 | 4,4   |
| 94  | 0,3  | 0,1 | 13,2 | 0,297  | 0,000 | 39,6  | 0,4  | 0,1 | 6,5   | 0,3  | 0,000 | 15,8  |
| 203 | 0,6  | 0,1 | 16,8 | 0,566  | 0,000 | 26,0  | 0,5  | 0,3 | 16,6  | 3,7  | 0,001 | 34,1  |
| 92  | 2,1  | 3,1 | 89,5 | 15,188 | 0,001 | 41,9  | 0,5  | 0,0 | 104,2 | 8,4  | 0,000 | 211,2 |
| 91  | 1,3  | 0,6 | 16,7 | 4,249  | 0,003 | 12,5  | 2,7  | 1,6 | 19,3  | 6,0  | 0,010 | 7,2   |
| 210 | 1,4  | 1,3 | 16,7 | 0,679  | 0,000 | 12,2  | 1,3  | 1,0 | 13,6  | 2,6  | 0,002 | 10,7  |
| 146 | 0,2  | 0,0 | 72,7 | 11,586 | 0,000 | 359,5 | 0,4  | 0,1 | 58,2  | 12,6 | 0,001 | 153,5 |
| 150 | 1,1  | 0,5 | 24,4 | 7,658  | 0,006 | 22,2  | 1,2  | 0,5 | 16,3  | 5,8  | 0,011 | 13,6  |
| 233 | 0,9  | 0,7 | 8,6  | 2,957  | 0,012 | 9,8   | 0,6  | 0,4 | 17,1  | 6,5  | 0,012 | 27,1  |
| 265 | 0,6  | 0,0 | 3,1  | 0,481  | 0,001 | 5,4   | 0,7  | 0,1 | 3,3   | 0,2  | 0,000 | 5,0   |

1869270 AGCTAGTTTGAATGANNT 1-aminocyclopropane-1-carboxylate oxidase [*Phyllostachys edulis*] ---- 1 6e-13 BAB32502.1  
1869494 AGCTTTGGTTAATTTGTG Putative fiddlehead-like protein [*Oryza sativa* (japonica cultivar-group)] ---- 57 0.0 AAN65442.1  
1869559 AGCTGAGGACCAGGAGAC probable glutamyl-tRNA reductase (EC 1.2.1.-) 1 precursor, chloroplast - barley emb|CAA60054.1| glutamyl tRNA reductase [*Hordeu*  
1869571 AGCTGCTGATACGGTTGY unnamed protein product [*Oryza sativa* (japonica cultivar-group)] dbj|BAB03362.1| unnamed protein product [*Oryza sativa* (japonica  
1869763 AGCTGCCGGAGAGGATCC agglutinin [*Amaranthus caudatus*] ---- 79 9e-25 AAL05954.1  
1869771 AGCTCAAACATTCCTACCG unnamed protein product [*Homo sapiens*] ---- 3 6e-06 BAC87611.1  
1869841 AGCTAGCCTTGAATCCAA 33 kDa secretory protein-related [*Arabidopsis thaliana*] dbj|BAA96974.1| 33 kDa secretory protein-like [*Arabidopsis thaliana*] ---- 18 2  
1869854 AGCTTMCCTTCGATTACGT  
1869862 AGCTACTGCCATTGTTGG ----  
1870039 AGCTTACACTGCAGGGAA  
1870056 AGCTAAMCGTACAAAARG  
1870058 AGCTAAAYTGTAACAAAAG hydroxyproline-rich glycoprotein family protein [*Arabidopsis thaliana*] dbj|BAB03089.1| unnamed protein product [*Arabidopsis thalian*  
1870090 AGCTGTTGTGNCWTCACA ABC transporter-like protein [*Glycine max*] ---- 1 3e-61 AAL66714.1  
1870549 AGCTGCAGGGAATGTTGC OSJNBa0005N02.3 [*Oryza sativa* (japonica cultivar-group)] ---- 4 1e-105 CAE02070.2  
1870573 AGCTCTCGAAGAAATAAC  
1870662 AGCTGGCGTGCATGTGGT unknown protein [*Oryza sativa* (japonica cultivar-group)] gb|AAT07641.1| unknown protein [*Oryza sativa* (japonica cultivar-group)] ---  
1870704 AGCTGATGNACAGCGCAG translation initiation factor IF-2 homolog F2P3.9 - *Arabidopsis thaliana* ---- 8 1e-116 T01917  
1870840 AGCTGCTSCCGCCGCCGG cytochrome P450 [*Triticum aestivum*] ---- 56 0.0 AAG17469.1  
1870871 AGCTAGCTGGGTTGAGAC putative NEP1-interacting protein [*Oryza sativa* (japonica cultivar-group)] dbj|BAD08961.1| putative NEP1-interacting protein [*Oryza*  
1870933 AGCTGGTATAGCATAAGT  
1870955 AGCTATCGNNTGGACTAC P0684B02.9 [*Oryza sativa* (japonica cultivar-group)] ref|NP\_917127.1| P0421H07.29 [*Oryza sativa* (japonica cultivar-group)] ---- 16 1  
1871071 AGCTGTTAGGAATAAGYA putative tetrafunctional protein for glyoxysomal fatty acid beta-oxidation [*Oryza sativa*] ---- 38 3e-26 NP\_910159.1  
1871201 AGCTCCTCGTCTTGGCAT  
1871230 AGCTATATGCGCGTAGCC  
1871371 AGCTCTGAGCAACAGTCT Protein disulfide isomerase precursor (PDI) (Endosperm protein E-1) pir|T05974 protein disulfide-isomerase (EC 5.3.4.1) precursor  
1871745 AGCTAAGGTCTCTACYTT  
1871849 AGCTGGTGCCCGCCACCG allyl alcohol dehydrogenase-like protein - *Arabidopsis thaliana* emb|CAB75803.1| allyl alcohol dehydrogenase-like protein [*Arabidops*  
1871857 AGCTAGKCATGTCAGTAT  
1872702 AGCTGAYGATCATCATCA related to muscle-derived protein (neurite-outgrowth-promoting) [*Neurospora crassa*] ---- 1 1e-37 CAE76120.1  
1872834 AGCTCCGTGCGAATCGTG putative lipid transfer protein [*Oryza sativa* (japonica cultivar-group)] gb|AAN05565.1| putative lipid transfer protein [*Oryza sativa* (jap  
1873068 AGCTCGGCGCAGGATCTA  
1873550 AGCTGTTCCGGTGGNAGC nodulin-like protein [*Oryza sativa* (japonica cultivar-group)] ---- 4 1e-114 BAC22240.1  
1873658 AGCTAYCACCAGTCTAGG COG0744: Membrane carboxypeptidase (penicillin-binding protein) [*Enterococcus faecium*] ---- 5 .61 ZP\_00285335.1  
1874098 AGCTTATTCCTGTCATTT OSJNBb0118P14.9 [*Oryza sativa* (japonica cultivar-group)] ---- 7 3e-05 CAE02024.2  
1874149 AGCTGTACGTGTNTTGYA

|     |      |     |      |        |       |       |      |      |      |      |       |      |
|-----|------|-----|------|--------|-------|-------|------|------|------|------|-------|------|
| 121 | 49,4 | 5,3 | 7,8  | 2,655  | 0,000 | -6,3  | 40,3 | 9,4  | 8,5  | 2,9  | 0,005 | -4,7 |
| 209 | 4,3  | 0,8 | 0,8  | 0,025  | 0,002 | -5,4  | 2,6  | 2,1  | 1,4  | 0,2  | 0,368 | -1,9 |
| 151 | 11,3 | 1,3 | 2,2  | 0,399  | 0,000 | -5,2  | 7,8  | 1,9  | 2,5  | 0,1  | 0,008 | -3,2 |
| 139 | 9,1  | 0,7 | 53,0 | 3,654  | 0,000 | 5,8   | 4,7  | 1,4  | 33,5 | 2,5  | 0,000 | 7,1  |
| 225 | 10,5 | 1,3 | 1,6  | 0,120  | 0,000 | -6,5  | 5,4  | 0,6  | 3,2  | 0,3  | 0,004 | -1,7 |
| 229 | 5,0  | 0,3 | 29,5 | 7,358  | 0,005 | 5,9   | 5,6  | 0,6  | 28,6 | 7,2  | 0,005 | 5,1  |
| 156 | 1,4  | 0,5 | 28,7 | 8,237  | 0,005 | 19,9  | 1,3  | 0,4  | 16,8 | 4,5  | 0,004 | 12,5 |
| 161 | 0,7  | 0,1 | 3,2  | 0,112  | 0,000 | 4,7   | 0,9  | 0,3  | 3,3  | 0,3  | 0,001 | 3,8  |
| 164 | 1,5  | 0,2 | 19,4 | 3,356  | 0,001 | 12,8  | 1,5  | 0,4  | 18,0 | 3,1  | 0,001 | 11,9 |
| 219 | 0,6  | 0,2 | 8,4  | 0,374  | 0,000 | 13,1  | 0,7  | 0,3  | 14,2 | 0,3  | 0,000 | 19,5 |
| 229 | 10,6 | 2,2 | 1,9  | 0,449  | 0,002 | -5,5  | 11,4 | 3,1  | 2,8  | 1,1  | 0,010 | -4,0 |
| 230 | 46,0 | 1,9 | 10,7 | 0,707  | 0,000 | -4,3  | 51,5 | 2,2  | 16,2 | 0,6  | 0,000 | -3,2 |
| 111 | 0,7  | 0,1 | 27,8 | 1,994  | 0,000 | 40,4  | 0,5  | 0,1  | 14,3 | 1,0  | 0,000 | 27,2 |
| 304 | 8,9  | 1,7 | 0,9  | 0,593  | 0,002 | -10,0 | 8,5  | 1,9  | 1,1  | 0,7  | 0,003 | -7,7 |
| 188 | 0,5  | 0,1 | 14,4 | 3,290  | 0,002 | 29,0  | 0,4  | 0,2  | 5,7  | 1,5  | 0,004 | 14,1 |
| 208 | 20,7 | 6,2 | 2,2  | 0,419  | 0,007 | -9,2  | 11,9 | 5,9  | 5,2  | 0,3  | 0,118 | -2,3 |
| 218 | 0,4  | 0,1 | 16,8 | 3,637  | 0,001 | 41,0  | 0,5  | 0,3  | 19,0 | 5,0  | 0,003 | 36,9 |
| 278 | 1,2  | 0,5 | 5,8  | 0,486  | 0,000 | 5,0   | 0,7  | 0,5  | 9,0  | 0,3  | 0,000 | 13,4 |
| 148 | 5,4  | 1,5 | 42,8 | 9,671  | 0,003 | 7,9   | 4,9  | 1,4  | 37,8 | 9,3  | 0,004 | 7,7  |
| 127 | 7,0  | 1,5 | 1,6  | 0,164  | 0,004 | -4,4  | 6,9  | 1,4  | 2,2  | 0,5  | 0,005 | -3,2 |
| 342 | 0,6  | 0,1 | 4,5  | 0,966  | 0,002 | 7,3   | 0,7  | 0,4  | 4,3  | 1,0  | 0,003 | 6,6  |
| 113 | 33,7 | 3,9 | 8,6  | 1,359  | 0,000 | -3,9  | 50,5 | 11,4 | 15,4 | 2,2  | 0,006 | -3,3 |
| 177 | 0,8  | 0,4 | 13,1 | 1,336  | 0,000 | 17,3  | 0,6  | 0,5  | 4,6  | 0,6  | 0,001 | 7,6  |
| 202 | 4,3  | 1,5 | 0,5  | 0,276  | 0,009 | -8,9  | 3,1  | 1,6  | 1,4  | 0,8  | 0,104 | -2,3 |
| 275 | 4,1  | 1,7 | 38,0 | 6,577  | 0,001 | 9,3   | 4,3  | 2,9  | 39,0 | 8,2  | 0,002 | 9,1  |
| 95  | 0,4  | 0,2 | 39,3 | 5,725  | 0,000 | 100,0 |      | 0,0  | 48,9 | 10,2 | 0,001 |      |
| 247 | 10,3 | 1,5 | 2,1  | 0,432  | 0,001 | -4,9  | 7,9  | 1,3  | 4,3  | 0,8  | 0,016 | -1,8 |
| 238 | 1,0  | 0,5 | 13,0 | 3,401  | 0,004 | 13,0  | 1,4  | 0,8  | 16,3 | 5,9  | 0,011 | 11,2 |
| 138 | 0,6  | 0,0 | 2,4  | 0,205  | 0,000 | 3,8   | 0,2  | 0,1  | 3,0  | 0,1  | 0,000 | 14,3 |
| 230 | 6,8  | 4,0 | 2,2  | 1,247  | 0,270 | -3,1  | 7,0  | 4,1  | 5,7  | 3,3  | 0,781 | -1,2 |
| 142 | 1,1  | 0,5 | 39,0 | 34,731 | 0,132 | 36,2  | 0,8  | 0,1  | 78,8 | 37,7 | 0,023 | 92,8 |
| 332 | 0,6  | 0,1 | 3,6  | 0,797  | 0,003 | 6,0   | 0,6  | 0,3  | 4,2  | 0,9  | 0,003 | 6,6  |
| 249 | 0,7  | 0,6 | 7,3  | 5,173  | 0,216 | 10,2  | 1,7  | 0,9  | 8,4  | 5,4  | 0,283 | 5,0  |
| 167 | 5,1  | 1,4 | 28,2 | 7,826  | 0,007 | 5,5   | 4,6  | 1,2  | 16,2 | 3,1  | 0,004 | 3,5  |
| 121 | 4,6  | 1,2 | 0,8  | 0,217  | 0,006 | -5,6  | 3,4  | 0,6  | 1,5  | 0,2  | 0,005 | -2,3 |

1874375 AGCTGATGGCACATGTTG Chorismate synthase 2, chloroplast precursor (5-enolpyruvylshikimate-3-phosphate phospholyase 2) pir||S40409 chorismate synthase  
1874487 AGCTATTGTACGCTGGAT putative ethylene-responsive small GTP-binding protein [Oryza sativa (japonica cultivar-group)] ---- 61 1e-108 BAC80082.1  
1874575 AGCTCAGAAATTTGCNAAN hypothetical protein [Arabidopsis thaliana] pir||B86253 hypothetical protein [imported] - Arabidopsis thaliana ---- 1 3e-32 NP\_172652.  
1874801 AGCTGTGCYAACAAGAGA  
1874849 AGCTTTGCACAACGATGC putative nitrate transporter NRT1-5 [Oryza sativa (japonica cultivar-group)] ---- 23 1e-153 BAC83856.1  
1875048 AGCTGGAGGATGGTCGCA polyubiquitin [Sporobolus stapfianus] ---- 6 1e-124 AAD30173.1  
1875182 AGCTGCACGCACGTACTA lycopene beta-cyclase [Zea mays] ---- 25 8e-39 AAO18661.1  
1875341 AGCTTCAATAAAAAAGGYT haloacid dehalogenase-like hydrolase family protein [Arabidopsis thaliana] ---- 8 5e-25 NP\_181658.1  
1875623 AGCTGGAGTGTCTTCAGT putative chloroplast outer envelope hexokinase 1 [Oryza sativa (japonica cultivar-group)] ---- 10 1e-180 NP\_914545.1  
1875716 AGCTCCATGGACAGGAGG pit2 protein (clone pAL141), Pi starvation induced - common tobacco dbj|BAA06151.1| The expression is induced by Pi starvation. [N  
1876066 AGCTATAGCCGGGGAGAT putative serine/threonine kinase [Oryza sativa (japonica cultivar-group)] ---- 21 0.0 BAC10350.1  
1876213 AGCTAGGCGGCGACCTGC putative malate dehydrogenase [Oryza sativa (japonica cultivar-group)] dbj|BAB55686.1| putative malate dehydrogenase [Oryza sati  
1876350 AGCTAGCGCACAGTRNTA  
1876499 AGCTCCCTGGNCTGGCG  
1876785 AGCTGTTGCTCCAACAGT cinnamoyl-CoA reductase [Populus balsamifera subsp. trichocarpa] ---- 6 8e-58 CAC07424.1  
1876861 AGCTGAAATCTTGAAANN cinnamoyl-CoA reductase [Populus balsamifera subsp. trichocarpa] ---- 6 8e-58 CAC07424.1  
1877143 AGCTACGACTGTAAGAGT  
1877695 AGCTAAYTCNCCCGTGGA MtN3-like protein [Oryza sativa (japonica cultivar-group)] dbj|BAB92465.1| MtN3-like protein [Oryza sativa (japonica cultivar-group)] -  
1877950 AGCTCAAGCTACTCCCAA  
1877970 AGCTCGACATTGTCGNTA hypothetical membrane protein [Thermoplasma acidophilum] emb|CAC12253.1| hypothetical membrane protein [Thermoplasma acid  
1877981 AGCTATGAACCCGTGTGT  
1878489 AGCTGGTTGCAAGTAATC senescence-associated protein-related [Arabidopsis thaliana] ---- 21 2e-10 NP\_199517.1  
1878824 AGCTATCATGTATACTTC  
1878980 AGCTGCNGTCTTKTTGG hypothetical protein [Oryza sativa (japonica cultivar-group)] gb|AAM92295.1| hypothetical protein [Oryza sativa (japonica cultivar-gro  
1878996 AGCTGCCATCCTCATGAG unnamed protein product [Oryza sativa (japonica cultivar-group)] dbj|BAA99381.1| unnamed protein product [Oryza sativa (japonica  
1879012 AGCTTAGTAGYCATGACA HECT-domain-containing protein / ubiquitin-transferase family protein [Arabidopsis thaliana] ---- 12 0.0 NP\_188346.1  
1879081 AGCTAANNCTCCATAGAG RPT2-like protein [Sorghum bicolor] ---- 2 7e-17 AAO16688.1  
1879348 AGCTSCGAGCAGTTTTRA tryptophan synthase beta-subunit [Sorghum bicolor] ---- 63 0.0 AAL73524.1  
1879360 AGCTGKGGTAATCCGATT  
1880508 AGCTANGGACTTCGCGTC B1139B11.9 [Oryza sativa (japonica cultivar-group)] ---- 2 2e-46 BAB90781.1  
1880788 AGCTTGTTWGCAGCGGC  
1880792 AGCTGCCCTCNAACCGWAT putative 60S ribosomal protein L38 [Oryza sativa (japonica cultivar-group)] ---- 65 3e-30 NP\_910603.1  
1880988 AGCTCGTGATGATGAWG Transcription factor HBP-1a (Histone-specific transcription factor HBP1) pir||A41349 histone-specific transcription factor HBP1 - whe  
1881071 AGCTGTTTTGCTGTAGCC  
1881198 AGCTAGTCAACGGATTAT metallothioneine type2 [Hordeum vulgare subsp. vulgare] ---- 21 2e-45 CAD54080.1

|     |      |      |      |        |       |       |      |      |      |      |       |      |
|-----|------|------|------|--------|-------|-------|------|------|------|------|-------|------|
| 355 | 6,0  | 1,6  | 35,6 | 9,557  | 0,006 | 5,9   | 8,6  | 1,9  | 35,9 | 11,3 | 0,014 | 4,2  |
| 185 | 15,5 | 1,4  | 54,0 | 3,240  | 0,000 | 3,5   | 11,6 | 0,6  | 35,4 | 2,4  | 0,000 | 3,1  |
| 108 | 0,3  | 0,1  | 1,8  | 0,127  | 0,000 | 5,4   | 0,3  | 0,2  | 0,8  | 0,1  | 0,011 | 2,4  |
| 212 | 1,3  | 0,5  | 9,5  | 2,583  | 0,006 | 7,4   | 1,5  | 0,5  | 9,8  | 2,8  | 0,007 | 6,6  |
| 167 |      | 0,0  | 3,1  | 0,060  | 0,000 |       | 0,6  | 0,3  | 1,1  | 0,1  | 0,012 | 1,9  |
| 318 | 11,3 | 3,1  | 59,3 | 9,258  | 0,001 | 5,2   | 14,3 | 4,4  | 59,9 | 10,1 | 0,002 | 4,2  |
| 206 | 50,8 | 20,1 | 8,2  | 1,994  | 0,022 | -6,2  | 23,2 | 8,5  | 13,8 | 2,0  | 0,138 | -1,7 |
| 258 | 68,7 | 9,1  | 9,7  | 1,835  | 0,000 | -7,0  | 84,3 | 12,6 | 33,3 | 0,6  | 0,002 | -2,5 |
| 156 | 2,8  | 0,2  | 29,8 | 1,684  | 0,000 | 10,8  | 3,1  | 0,2  | 12,3 | 0,9  | 0,000 | 3,9  |
| 263 | 10,9 | 2,2  | 53,9 | 11,638 | 0,003 | 4,9   | 15,6 | 2,1  | 46,1 | 10,4 | 0,008 | 3,0  |
| 92  | 48,5 | 5,4  | 5,0  | 0,371  | 0,000 | -9,7  | 36,4 | 4,5  | 6,2  | 1,2  | 0,000 | -5,9 |
| 304 | 0,4  | 0,1  | 2,6  | 0,476  | 0,001 | 6,4   | 1,0  | 0,3  | 3,3  | 1,0  | 0,021 | 3,2  |
| 137 | 18,2 | 2,3  | 4,2  | 0,371  | 0,000 | -4,4  | 12,2 | 1,4  | 4,4  | 0,2  | 0,001 | -2,7 |
| 241 | 35,2 | 2,0  | 6,1  | 0,787  | 0,000 | -5,8  | 31,6 | 2,0  | 5,8  | 0,9  | 0,000 | -5,5 |
| 154 | 7,3  | 0,3  | 41,6 | 5,159  | 0,000 | 5,7   | 6,8  | 0,6  | 43,1 | 1,6  | 0,000 | 6,3  |
| 88  | 9,9  | 2,3  | 54,5 | 1,978  | 0,000 | 5,5   | 10,2 | 2,3  | 65,6 | 1,9  | 0,000 | 6,4  |
| 173 | 2,1  | 1,1  | 25,7 | 5,496  | 0,002 | 12,2  | 1,6  | 0,7  | 21,9 | 6,1  | 0,005 | 13,3 |
| 209 | 5,7  | 0,6  | 1,1  | 0,478  | 0,001 | -5,1  | 3,9  | 0,3  | 2,8  | 0,4  | 0,021 | -1,4 |
| 137 | 1,1  | 0,8  | 12,1 | 0,580  | 0,000 | 11,1  | 1,5  | 1,4  | 10,1 | 0,7  | 0,001 | 7,0  |
| 121 | 5,1  | 0,9  | 1,2  | 0,233  | 0,002 | -4,3  | 6,0  | 0,9  | 2,6  | 0,2  | 0,003 | -2,3 |
| 110 | 1,1  | 0,2  | 6,2  | 0,463  | 0,000 | 5,4   | 1,7  | 0,3  | 4,9  | 1,1  | 0,009 | 2,9  |
| 236 | 17,4 | 6,5  | 2,3  | 0,811  | 0,016 | -7,5  | 14,8 | 4,7  | 3,4  | 1,5  | 0,016 | -4,4 |
| 117 | 0,8  | 0,1  | 5,2  | 1,560  | 0,008 | 6,3   | 1,1  | 0,3  | 4,7  | 1,6  | 0,019 | 4,3  |
| 191 | 1,1  | 0,3  | 7,5  | 1,160  | 0,001 | 6,9   | 0,8  | 0,3  | 6,4  | 0,8  | 0,000 | 8,3  |
| 205 | 2,2  | 0,5  | 15,4 | 5,781  | 0,017 | 6,9   | 1,7  | 1,0  | 9,8  | 3,4  | 0,017 | 5,6  |
| 217 |      | 0,0  | 69,2 | 39,983 | 0,116 |       | 69,3 | 40,0 | 10,3 | 6,5  | 0,527 | -6,7 |
| 275 | 5,8  | 0,3  | 1,6  | 0,139  | 0,000 | -3,6  | 6,1  | 0,8  | 3,4  | 0,4  | 0,007 | -1,8 |
| 218 | 1,3  | 0,1  | 35,3 | 3,618  | 0,000 | 27,6  | 1,5  | 0,2  | 23,7 | 1,1  | 0,000 | 16,1 |
| 231 | 1,1  | 0,6  | 14,2 | 6,046  | 0,020 | 13,3  | 0,8  | 0,4  | 14,9 | 5,3  | 0,010 | 17,9 |
| 225 | 1,6  | 0,1  | 6,4  | 0,376  | 0,000 | 4,1   | 0,8  | 0,2  | 9,9  | 5,7  | 0,152 | 12,8 |
| 242 | 12,2 | 3,1  | 2,1  | 0,645  | 0,005 | -5,9  | 3,9  | 2,1  | 2,6  | 2,0  | 0,262 | -1,5 |
| 247 | 3,3  | 0,6  | 0,6  | 0,148  | 0,001 | -5,5  | 4,1  | 0,3  | 1,6  | 0,3  | 0,000 | -2,6 |
| 225 | 6,5  | 0,9  | 1,7  | 0,171  | 0,001 | -3,7  | 6,1  | 1,2  | 2,1  | 0,7  | 0,007 | -3,0 |
| 157 | 1,6  | 0,7  | 47,7 | 11,675 | 0,002 | 29,2  | 2,2  | 0,4  | 34,9 | 10,2 | 0,005 | 16,1 |
| 190 | 97,5 | 39,2 | 5,9  | 2,856  | 0,016 | -16,7 | 65,6 | 23,0 | 10,5 | 10,4 | 0,019 | -6,3 |

|         |                    |                                                                                                                                        |
|---------|--------------------|----------------------------------------------------------------------------------------------------------------------------------------|
| 1881212 | AGCTAGCGCGGGGTNGTG | putative nuclease [Oryza sativa (japonica cultivar-group)] dbj BAB64802.1  putative nuclease [Oryza sativa (japonica cultivar-group)]  |
| 1881382 | AGCTGCATGACCTTGGGA | P0678F11.26 [Oryza sativa (japonica cultivar-group)] ---- 3 5e-69 BAB86119.1                                                           |
| 1881644 | AGCTCTCATTAGAAAGAA | ENDOPLASMIN HOMOLOG PRECURSOR (GRP94 HOMOLOG) pir  S33533 heat shock protein 90 homolog precursor - barley eml                         |
| 1881777 | AGCTCCGTGGTCTTGGGG |                                                                                                                                        |
| 1882005 | AGCTAGTTAATTGGTTGT | putative steroid 5alpha-reductase [Oryza sativa (japonica cultivar-group)] dbj BAC15959.1  steroid 5alpha-reductase-like protein [Ory  |
| 1883029 | AGCTGCACGGGTGGTCGT |                                                                                                                                        |
| 1883426 | AGCTTGAANAACAGGAAC |                                                                                                                                        |
| 1883988 | AGCTGGTAACGAAGGTGA | photosystem II protein W-like protein [Oryza sativa (japonica cultivar-group)] dbj BAB89717.1  photosystem II protein W-like protein [ |
| 1883989 | AGCTGTAAACGAAGGTGA |                                                                                                                                        |
| 1884021 | AGCTGATCCCTGAATNTA |                                                                                                                                        |
| 1885170 | AGCTCGGACTGATCCATG | pathogenesis-related protein 4 - barley emb CAA71774.1  pathogenesis-related protein 4 [Hordeum vulgare] ---- 72 5e-84 T06169          |
| 1885182 | AGCTCTTCCCAMCCAACA |                                                                                                                                        |
| 1885185 | AGCTCCGSCCACGGCTTT |                                                                                                                                        |
| 1885186 | AGCTACCGCCACGGCTTT | WIR1A PROTEIN pir  T06988 pathogen-induced protein WIR1A - wheat gb AAA34311.1  WIR1A ---- 28 7e-07 Q01482                             |
| 1885224 | AGCTGATCNRTCCGTCGT | bacterial-induced peroxidase precursor [Gossypium hirsutum] ---- 36 1e-108 AAD43561.1                                                  |
| 1885439 | AGCTCANAGCGTCAATCG | hydroxymethyltransferase [Arabidopsis thaliana] ---- 2 5e-14 AAM64493.1                                                                |
| 1885538 | AGCTTCGCGAGATRGGAR | ----                                                                                                                                   |
| 1885739 | AGCTAGAGATGGAAAAAT |                                                                                                                                        |
| 1885857 | AGCTAATGTCTGTTGNTG | UDP-glucose dehydrogenase [Cinnamomum osmophloeum] ---- 40 0.0 AAR84297.1                                                              |
| 1885870 | AGCTGGCTCGGTGCCTAG | ----                                                                                                                                   |
| 1886620 | AGCTGCNCGAATGTCGCA |                                                                                                                                        |
| 1888750 | AGCTCKATGMAAATGAGC |                                                                                                                                        |
| 1889104 | AGCTAATCACGAAACTAA |                                                                                                                                        |
| 1889166 | AGCTGCCTGTCCGCGAGT |                                                                                                                                        |
| 1889276 | AGCTCATHAGAAAANGTA | OSJNBa0084K20.12 [Oryza sativa (japonica cultivar-group)] emb CAE02488.2  OSJNBa0076N16.10 [Oryza sativa (japonica cultivar-gr         |
| 1889654 | AGCTCCATTGTAATCGAC | membrane bound O-acyl transferase (MBOAT) family protein [Arabidopsis thaliana] ---- 20 0.0 NP_172724.2                                |
| 1890256 | AGCTGGCAATCCNNTGAA | Hypothetical protein [Oryza sativa (japonica cultivar-group)] gb AAN64138.1  Hypothetical protein [Oryza sativa (japonica cultivar-grc |
| 1890465 | AGCTGGCTCGGAGCNTAT | ----                                                                                                                                   |
| 1890890 | AGCTCTACTGTACCTGCC | putative phospholipase [Oryza sativa] gb AAK82449.1  putative phospholipase [Oryza sativa] gb AAL79754.1  putative phospholipas        |
| 1891973 | AGTTTCAATTTTGTTCAT | Phosphoglycerate kinase, chloroplast precursor pir  TVWTGC phosphoglycerate kinase (EC 2.7.2.3) precursor, chloroplast - wheat e       |
| 1891986 | AGCTNGATCGGTCCATCA |                                                                                                                                        |
| 1892491 | AGCTCAAGGACGGCTACA | hypothetical protein pBH6-12 - barley emb CAA74593.1  hypothetical protein [Hordeum vulgare] ---- 88 1e-131 T06204                     |
| 1892647 | AGCTGATGGCACATGTTG | Chorismate synthase 2, chloroplast precursor (5-enolpyruvylshikimate-3-phosphate phospholyase 2) pir  S40409 chorismate synthas        |
| 1892797 | AGCTGAGTTCGTRCGAGA |                                                                                                                                        |
| 1892798 | AGCTGAACAAGTACGATA | oxo-phytodienoic acid reductase [Oryza sativa (japonica cultivar-group)] ---- 7 2e-79 CAD89605.1                                       |

|     |      |      |      |        |       |      |      |     |      |      |       |      |
|-----|------|------|------|--------|-------|------|------|-----|------|------|-------|------|
| 200 | 1,4  | 0,3  | 7,2  | 0,622  | 0,000 | 5,2  | 0,6  | 0,4 | 7,6  | 0,6  | 0,000 | 13,3 |
| 355 | 5,5  | 1,0  | 45,5 | 7,077  | 0,001 | 8,2  | 4,3  | 0,6 | 42,7 | 9,2  | 0,002 | 10,0 |
| 203 | 5,2  | 2,3  | 41,4 | 7,803  | 0,002 | 8,0  | 5,5  | 2,1 | 42,4 | 11,0 | 0,005 | 7,8  |
| 314 | 0,6  | 0,2  | 20,8 | 9,777  | 0,023 | 32,8 | 0,6  | 0,2 | 21,3 | 11,9 | 0,040 | 35,9 |
| 170 | 56,6 | 10,7 | 11,2 | 1,329  | 0,002 | -5,0 | 47,2 | 5,8 | 21,2 | 4,5  | 0,004 | -2,2 |
| 291 | 0,6  | 0,4  | 17,6 | 10,642 | 0,050 | 31,2 | 1,1  | 0,6 | 17,7 | 10,2 | 0,048 | 16,1 |
| 276 | 8,0  | 2,8  | 34,0 | 3,550  | 0,001 | 4,2  | 6,0  | 0,5 | 45,2 | 5,2  | 0,000 | 7,5  |
| 135 | 39,3 | 4,6  | 6,6  | 0,084  | 0,000 | -5,9 | 35,9 | 5,4 | 11,6 | 1,1  | 0,002 | -3,1 |
| 134 | 12,2 | 3,3  | 2,6  | 0,085  | 0,007 | -4,7 | 10,2 | 2,9 | 3,8  | 0,8  | 0,022 | -2,6 |
| 109 | 6,6  | 0,3  | 1,4  | 0,139  | 0,000 | -4,7 | 6,6  | 0,7 | 1,5  | 0,2  | 0,000 | -4,5 |
| 133 | 0,3  | 0,1  | 19,0 | 7,009  | 0,010 | 68,2 | 0,5  | 0,3 | 9,2  | 3,1  | 0,008 | 19,4 |
| 144 | 2,3  | 0,6  | 15,2 | 2,763  | 0,001 | 6,5  | 1,9  | 0,5 | 8,6  | 4,3  | 0,053 | 4,6  |
| 147 | 1,7  | 0,1  | 17,7 | 0,905  | 0,000 | 10,7 | 1,2  | 0,2 | 16,6 | 2,6  | 0,001 | 13,5 |
| 148 | 2,5  | 2,3  | 65,3 | 12,779 | 0,001 | 25,7 | 2,6  | 2,5 | 66,2 | 18,9 | 0,004 | 25,2 |
| 182 | 15,7 | 2,5  | 2,0  | 0,313  | 0,001 | -7,8 | 7,0  | 2,1 | 1,6  | 0,2  | 0,011 | -4,5 |
| 387 | 1,3  | 0,5  | 32,1 | 10,937 | 0,008 | 23,9 | 1,7  | 0,8 | 39,3 | 13,6 | 0,009 | 23,2 |
| 234 | 19,2 | 4,1  | 4,0  | 0,558  | 0,003 | -4,8 | 7,2  | 2,9 | 6,2  | 0,3  | 0,576 | -1,2 |
| 206 | 0,8  | 0,4  | 40,2 | 8,048  | 0,001 | 51,2 | 2,1  | 1,5 | 43,1 | 6,5  | 0,000 | 20,8 |
| 113 | 2,8  | 0,2  | 20,0 | 0,304  | 0,000 | 7,1  | 4,7  | 1,7 | 20,2 | 4,3  | 0,004 | 4,3  |
| 103 | 0,7  | 0,2  | 8,8  | 4,810  | 0,044 | 12,4 | 0,7  | 0,4 | 7,2  | 5,0  | 0,084 | 10,5 |
| 192 | 1,0  | 0,4  | 8,3  | 1,346  | 0,001 | 8,3  | 0,9  | 0,6 | 5,2  | 1,5  | 0,010 | 5,8  |
| 141 | 1,7  | 0,4  | 9,9  | 0,821  | 0,000 | 5,7  | 2,9  | 0,6 | 8,2  | 2,0  | 0,012 | 2,8  |
| 221 | 0,7  | 0,3  | 4,7  | 1,494  | 0,010 | 7,3  | 0,4  | 0,3 | 3,8  | 0,5  | 0,001 | 9,2  |
| 172 | 0,7  | 0,0  | 9,4  | 3,518  | 0,013 | 13,9 | 0,4  | 0,1 | 6,7  | 3,0  | 0,022 | 16,9 |
| 95  | 40,6 | 4,5  | 9,4  | 1,903  | 0,000 | -4,3 | 38,0 | 5,5 | 8,4  | 3,2  | 0,001 | -4,5 |
| 109 | 6,4  | 1,0  | 0,9  | 0,079  | 0,001 | -7,4 | 2,7  | 1,5 | 0,9  | 0,1  | 0,117 | -2,9 |
| 220 | 0,7  | 0,4  | 10,2 | 1,734  | 0,001 | 14,3 | 0,6  | 0,5 | 18,2 | 0,8  | 0,000 | 31,0 |
| 106 | 1,3  | 0,3  | 25,4 | 2,226  | 0,000 | 20,0 | 1,9  | 0,7 | 19,0 | 2,4  | 0,000 | 10,0 |
| 103 | 1,2  | 0,8  | 11,8 | 5,793  | 0,035 | 9,6  | 1,7  | 1,0 | 10,2 | 7,4  | 0,300 | 6,0  |
| 178 | 0,5  | 0,1  | 3,6  | 0,933  | 0,004 | 8,0  |      | 0,0 | 2,5  | 1,1  | 0,018 |      |
| 164 | 0,5  | 0,3  | 8,4  | 0,534  | 0,000 | 17,4 | 0,4  | 0,2 | 1,8  | 0,5  | 0,007 | 5,0  |
| 277 | 0,7  | 0,1  | 3,0  | 0,348  | 0,000 | 4,1  | 1,9  | 1,8 | 2,9  | 1,4  | 0,491 | 1,5  |
| 398 | 0,8  | 0,3  | 0,3  | 0,158  | 0,043 | -3,1 | 0,8  | 0,5 | 1,0  | 0,6  | 0,755 | 1,3  |
| 179 | 4,9  | 1,0  | 45,8 | 1,186  | 0,000 | 9,3  | 4,3  | 0,9 | 22,8 | 6,0  | 0,006 | 5,3  |
| 179 | 1,6  | 0,4  | 15,8 | 6,961  | 0,025 | 9,6  | 1,8  | 0,8 | 10,1 | 3,9  | 0,022 | 5,5  |



|         |                    |                                                                                                                                            |
|---------|--------------------|--------------------------------------------------------------------------------------------------------------------------------------------|
| 1893746 | AGCTGGAMMTTCGTGCTG |                                                                                                                                            |
| 1893757 | AGCTGCAGAGGTGAYAAG | Acetylnithine aminotransferase, mitochondrial precursor (ACOAT) (Acetylnithine transaminase) (AOTA) emb CAA69936.1  acety                  |
| 1894476 | AGCTGTTCTGGCACNGNA |                                                                                                                                            |
| 1895438 | AGCTCTGATCTCTTGGAG | glutamate dehydrogenase [Oryza sativa (japonica cultivar-group)] gb AAQ01156.1  glutamate dehydrogenase [Oryza sativa (japonica            |
| 1897130 | AGCTGAWGACCGACCGAT | putative zinc finger transcription factor [Oryza sativa (japonica cultivar-group)] dbj BAB12694.1  putative zinc finger transcription fact |
| 1899234 | AGCTAGAGKAGTTGAGGT | OSJNBa0020P07.12 [Oryza sativa (japonica cultivar-group)] ---- 60 1e-174 CAE01295.2                                                        |
| 1899965 | AGCTAGGGATCTTGGGCC | unnamed protein product [Oryza sativa (japonica cultivar-group)] dbj BAA96594.1  unnamed protein product [Oryza sativa (japonica           |
| 1901787 | AGCTATGAAKATNTGCAA | CBL-interacting protein kinase 4 [Arabidopsis thaliana] pir C71408 probable protein kinase - Arabidopsis thaliana ---- 1 3e-08 NP_19       |
| 1901844 | AGCTCANNGTGCGCAGCA | dnaJ-like protein [Oryza sativa (japonica cultivar-group)] dbj BAB89081.1  dnaJ-like protein [Oryza sativa (japonica cultivar-group)] --   |
| 1901932 | AGCTTTMGASCCCGAGA  |                                                                                                                                            |
| 1902012 | AGCTCGTCGCCCNNTCCA | hypothetical protein [Oryza sativa (japonica cultivar-group)] ---- 45 1e-130 AAP03354.1                                                    |
| 1904126 | AGCTAGCGTTGTTACNA  |                                                                                                                                            |
| 1904752 | AGCTCTCATGGCKAAAGA |                                                                                                                                            |
| 1904824 | AGCTGCTTATAAATTATA | subtilisin-chymotrypsin inhibitor 2 - barley emb CAA69915.1  subtilisin-chymotrypsin inhibitor 2 [Hordeum vulgare subsp. vulgare] ----     |
| 1905117 | AGCTCNAANCGCCAGCGA |                                                                                                                                            |

|     |      |     |      |       |       |       |      |     |      |      |       |      |
|-----|------|-----|------|-------|-------|-------|------|-----|------|------|-------|------|
| 175 | 0,5  | 0,0 | 4,2  | 0,411 | 0,000 | 7,7   | 0,6  | 0,1 | 2,9  | 0,4  | 0,001 | 4,9  |
| 185 | 0,9  | 0,2 | 10,9 | 2,241 | 0,002 | 12,7  | 0,9  | 0,2 | 9,5  | 3,6  | 0,015 | 11,0 |
| 265 | 0,2  | 0,1 | 5,0  | 2,905 | 0,131 | 21,2  |      | 0,0 | 6,4  | 0,4  | 0,000 |      |
| 165 | 0,5  | 0,3 | 2,3  | 1,349 | 0,196 | 4,9   | 0,5  | 0,2 | 1,0  | 0,6  | 0,651 | 2,0  |
| 123 | 0,3  | 0,1 | 1,4  | 0,909 | 0,223 | 5,4   |      | 0,0 | 1,7  | 1,0  | 0,120 |      |
| 261 | 0,4  | 0,1 | 5,5  | 1,063 | 0,001 | 13,8  | 0,8  | 0,6 | 8,0  | 2,3  | 0,005 | 10,7 |
| 304 | 4,4  | 1,4 | 0,8  | 0,058 | 0,012 | -5,3  | 3,7  | 3,3 | 1,7  | 0,2  | 0,339 | -2,3 |
| 206 | 15,6 | 8,4 | 4,5  | 2,583 | 0,068 | -3,5  | 10,1 | 8,6 | 11,1 | 6,4  | 0,917 | 1,1  |
| 154 | 1,2  | 0,7 | 8,7  | 5,112 | 0,170 | 7,0   | 1,3  | 0,8 | 6,9  | 4,0  | 0,151 | 5,2  |
| 156 | 3,3  | 0,4 | 21,9 | 0,438 | 0,000 | 6,7   | 3,0  | 0,5 | 19,4 | 1,0  | 0,000 | 6,4  |
| 222 | 1,9  | 0,3 | 7,1  | 0,585 | 0,000 | 3,7   | 2,0  | 0,3 | 5,0  | 0,4  | 0,001 | 2,5  |
| 225 | 2,6  | 1,5 | 0,2  | 0,123 | 0,148 | -11,4 | 2,4  | 0,6 | 0,3  | 0,2  | 0,004 | -6,9 |
| 192 | 0,7  | 0,3 | 6,5  | 0,949 | 0,001 | 8,7   | 0,8  | 0,2 | 6,7  | 0,2  | 0,000 | 8,6  |
| 248 | 5,1  | 1,4 | 0,7  | 0,175 | 0,006 | -7,4  | 5,1  | 1,8 | 2,0  | 0,2  | 0,040 | -2,6 |
| 230 | 3,3  | 1,9 | 16,8 | 9,745 | 0,190 | 5,1   | 2,7  | 1,6 | 20,7 | 12,4 | 0,148 | 7,6  |
